# Supplementary material
Source: PubMed Central journal article supplement (PMC4363254)
Supplement: 12088_2015_514_MOESM1_ESM.pdf [file 12088_2015_514_MOESM1_ESM.pdf]

## Results

### *Novel markers for identification of C. botulinum strains*

#### *RE-TaqI*

Variability in the fragments observed in the *rrs* sequences with RE TaqI allowed us to segregate the 13 strains into four groups. The first group was composed of strains Alaska E43 and Eklund 17B with an RE pattern of 88-585-198-55; 88-585-199 nts being common to them (Table S4). The two strains can be distinguished on the basis of RE pattern of 18-70-585-198-55 nts recorded only with Eklund 17B. The second and third groups composed of BKT015925 and ATCC 3502, respectively, had unique RE digestion patterns of 879-582 and 90-782 nts, respectively (Table S4). The fourth group composed of the rest of 9 strains were indistinguishable and had a single clear cut fragment of 872 nts.

#### *RE-Hpy188III*

RE-HPY188III could provide evidence for clear cut segregation of 13 *C. botulinum* strains into 4 groups. The digestion patterns of Alaska E43 and Eklund 17B were similar to each other, 502-96-88-261-76-274-86 nts, which formed a group independent of the rest of the strains (Table S5). The second group consisted of only BKT015925, which had a unique RE digestion pattern of 57-65-183-196-97-88-265-82-278 nts. The *C. botulinum* strain ATCC 3502 showed three different RE – Hpy188III digestion patterns. Of the three digestion patterns, two were unique to ATCC 3502: (i) 196-96-88-337-274 and (ii) 249-196-96-88-337-275, whereas the third RE pattern, 57-249-196-96-88-337-274 nts was shared by a large number of strains (Table S5). The fourth group with unique RE digestion pattern was consisting of ATCC 19397, which had one unique pattern 308-196-96-88-337-274, but shared its second RE digestion pattern with rest of the strains (Table S5).

#### *RE-Tsp509I*

As in the previous cases detected above, all the *rrs* copies of Alaska E43 (22/22) and Eklund 17B (22/22) showed a RE digestion pattern of similar kind, such that these two strains formed a group independent of the rest of the strains. The *C. botulinum* strain BKT015925 could be distinguished from the rest of strains

on the basis of its unique RE digestion pattern with Tsp509I: 581-67-287-46 nts (Table S6). It thus formed second group. In the third group, we could place Kyoto with unique RE digestion patterns. It showed high variability in the RE digestion, where the unique RE patterns: (i) 461-244-40 and (ii) 183-461-244-40 accounted for 2 of the 18 copies of *rrs*. *C. botulinum* strains Kyoto share the rest four RE digestion patterns with other *C. botulinum* strains with varying frequencies (Table S6).

#### *RE-HpyCH4III*

Digestion of *rrs* of *C. botulinum* with RE HpyCH4III, allowed us to segregate them into 4 groups. As observed with RE-TaqI, Alaska E43 and Eklund 17B formed a group independent of the rest of the strains. However, they could be distinguished from each other on the basis of a 370 nts fragment, which was found only in 8/22 *rrs* copies of Eklund 17B (Table S4). The second group consisted of only HO4402065, with a unique RE pattern of 128–261–518-184 nts. The third clear cut groups was formed by BKT015525, where all of the 10 copies of *rrs* had a unique RE-HpyCH4III digestion pattern – 126-261-151-565 nts (Table S4). RE-HpyCH4III was not helpful in distinguishing rest of the *C. botulinum* strains, as they shared their digestion pattern.

#### *RE - Hpy188I*

With RE-Hpy188I, unique digestion pattern was recorded with BKT015925: 153-716 (nts). *C. botulinum* strains Eklund 17B, ATCC 3502, ATCC 19397, Hall had two RE- Hpy188I digestion patterns each (Table S5). However, in each of these cases, they share only one of their RE patterns with each other, which permits their easy segregation. ATCC 3502 appeared to be a link between ATCC 19397 and Eklund 17B, since it shares one of its RE patterns with each one of them. Similarly Eklund 17B appears to be a link between ATCC 3502 and Alaska E43, on similar grounds.

#### *RE -NlaIV*

A unique RE – NlaIV digestion Pattern was recorded with BKT015925. Kyoto had three types of RE patterns, however, they donot match exactly with those recorded with any other strains. The RE digestion

patterns of Kyoto are shared by 230613 on one hand and other strains except Alaska E43 and Eklund 17B, on the other (Table S6).

#### *Other REs*

HPYCH4V was useful for distinguishing Kyoto in a clear cut manner (Table S5). Tsp45I proved helpful in segregating Alaska E43 and Eklund 17B strains (Table S4). Since it could digest *rrs* sequences of only these two strains. BstUI did not prove very helpful in distinguishing *C. botulinum* strains (Table S5).

#### *Nucleotide changes*

##### *Loss of RE sites*

A few cases of loss of RE sites due to NCs were observed due to transitions in *rrs* at different positions: 40, 67, 68, 74, 95, 122, 129, 211, 218, 223, 246, 250, 254, 257, 261, 408, 435, 440, 442, 974, 981, 983, 989, 993, 997, 1000, 1004, 1006, 1420 and 1427 (Table S8 and Fig. 2). It reflects on the susceptibility of different regions of *rrs* to spontaneous mutations. Here, transitions led to the loss of RE sites: (i) G>A led to the loss of RE sites for (1) AciI-(C'CGC), (2) AluI-(AG'CT), (3) BspMI-(ACCTGCnnnn'nnnn), (4) CviJI-(rG'Cy), (5) HindIII-(A'AGCTT), and (6) MaeIII-(GTnAC); (ii) A>G resulted in the loss of RE sites for (1) AleI-(CACnn'nnGTG), (2) BfaI-(C'TAG), (3) MaeIII-(GTnAC), (4) MslI-(CAynn'nnrTG) and (5) Tsp45I-(GTsAC); (iii) T>C transition resulted in the loss of (1) AleI-(CACnn'nnGTG), (2) MaeIII-(GTnAC), (3) MslI-(CAynn'nnrTG), and (4) Tsp45I-(GTsAC); and (iv) C>T transition lead to the loss of (1) MaeIII-(GTnAC) and (2) XmnI-(GAAnn'nnTTC). A perusal of all the transitions reveals that (i) all of them led to the loss of MaeIII-(GTnAC) site, (ii) A>G and/or T>C resulted in loss of sites for 3 REs (1) AleI, (2) MslI and (3) Tsp45I and (iii) G>A transitions resulted in loss of sites for multiple REs. Among these cases there was two transversion of C>A at position 983/989 in one *rrs* copy each of Alaska E43 and Eklund 17B, which led to the loss of TaqI-(T'CGA) site.

The affect of these losses in RE sites were most evident among 5-10 *rrs* copies of *C. botulinum* strains ATCC 3502, ATCC 19397 and Eklund 17B, followed by those in 2-4 *rrs* copies each of the rest of the strains (Table S8). Loch Maree was the only strain where no loss of RE sites was recorded.

#### *Cladistic analysis and RE digestion pattern*

A perusal of Table S10 reveals that it is possible to establish a close relationship among the 13 *C. botulinum* strains, on the basis of systematic absence or presence of certain HKGs in them. On the basis of those 11 genes which are not present in all the *C. botulinum* strains, it can be concluded that (i) ATCC3502 is unique, since it is the only strain which contains all these 11 genes, (ii) Kyoto, Loch Maree, Okra, and 657 form a second group with similarity to each other, with respect to the presence of *abrB*, *cphB*, *dltD*, *sfsA*, and *spmB* and absence of *arcA1*, *ccpA*, *dltB*, *mdeA*, *psd1*, and *psd2*, (iii) Langeland could be separated from group (ii) by the absence of gene *spmB*, (iv) ATCC19397 and Hall could be separated from group (ii) by the absence of gene *dltD* and from group (iii) due to the absence of *dltD* and presence of *spmB*, (v) Alaska E43 and Eklund 17B formed a very distinct group as they (a) don't contain genes *abrB* which were present in the rest of the 8 strains except H04402 065, BKT015925 and 230613 (b) but do contain gene *dltB* which was absent in rest of the strains except ATCC3502, Alaska E43 and Eklund 17B. These 2 strains can be distinguished from each other on the basis of presence of gene *sfsA* only in Alaska E43.

A critical analysis of cladistic tree drawn on the basis of concatenated 7 HKGs of 13 strains, revealed the following relationships: (i) Alaska E43 with Eklund 17B, (ii) ATCC19397, Hall, ATCC 3502 and H0442065 (iii) Okra with Kyoto (iv) 230613 with Langeland (Fig. 1). In addition, strain Loch Maree and 657 is intermediate to groups (i) (iii) and (iv), where as BKT015925 is independent. A comparison of cladistic analysis with RE digestion patterns of the *rrs* gene reveals that (i) Alaska E43 and Eklund 17B and (ii) BKT015925 formed two distinct groups (Tables S4-S6).

Table S1

Characteristics of sequenced genomes of *Clostridium botulinum* strains<sup>a</sup>

| <i>Clostridium botulinum</i> genome |                             |                            |              | <i>rrs</i> <sup>b</sup>                                                                                                                                                                                                                                                                     |                  |                                                |                |                                            |
|-------------------------------------|-----------------------------|----------------------------|--------------|---------------------------------------------------------------------------------------------------------------------------------------------------------------------------------------------------------------------------------------------------------------------------------------------|------------------|------------------------------------------------|----------------|--------------------------------------------|
| Strain<br>(Accession<br>no.)        | Origin                      | Size<br>(Mbp) <sup>c</sup> | G+C<br>% mol | RDP Accession no.                                                                                                                                                                                                                                                                           | G+C<br>% mol     | Intragenomic<br>heterogeneity <sup>d</sup> (%) |                | Copies <sup>e</sup><br>copies <sup>e</sup> |
|                                     |                             |                            |              |                                                                                                                                                                                                                                                                                             |                  | <i>rrs</i> (NS)                                | Pairwise       |                                            |
| Alaska E43,<br>CP001078             | Alaska,<br>US <sup>a</sup>  | 3.66                       | 27.4         | S001094751, S001094753, S001094755,<br>S001094758, S001094760, S001094762,<br>S001094764, S001094766, S001094768,<br>S001094770, S001094772, S002287743,<br>S002288016, S002288105, S002288383,<br>S002289948, S002290040, S002290286,<br>S002290445, S002290927, S002291044,<br>S002291294 | 51.52 -<br>52.09 | 0.39                                           | 0.06 -<br>0.33 | 22                                         |
| Eklund 17B,<br>CP001056             | US <sup>a</sup>             | 3.85                       | 27.5         | S001094703, S001094705, S001094707,<br>S001094710, S001094712, S001094714,<br>S001094716, S001094718, S001094720,<br>S001094722, S001094724, S002287177,<br>S002287243, S002288156, S002288548,<br>S002289273, S002289462, S002290154,<br>S002290241, S002290247, S002290368,<br>S002290659 | 51.52 -<br>52.09 | 0.53                                           | 0.06 -<br>0.46 | 22                                         |
| ATCC 3502,<br>AM412317              | Unknown,<br>US <sup>a</sup> | 3.9                        | 28.2         | S000858476, S000858478, S000858480,<br>S000858482, S000858484, S000858486,<br>S000858488, S000858491, S000858493,<br>S002287460, S002287580, S002288802,<br>S002288844, S002289360, S002289503,<br>S002290042, S002290179, S002290425                                                       | 52.05 -<br>52.60 | 0.97                                           | 0.06 -<br>0.55 | 18                                         |
| Okra,<br>CP000939                   | US <sup>i</sup>             | 4.11                       | 28.2         | S001014392, S001014394, S001014396,<br>S001014398, S001014400, S001014402,<br>S001014404, S001014407, S001014409 <sup>j</sup> ,<br>S002287372, S002287425, S002288021,<br>S002288411, S002288499, S002289495,<br>S002289731, S002290009, S002290479                                         | 51.92 -<br>52.53 | 0.46                                           | 0.06 -<br>0.33 | 18                                         |
| Langeland,<br>CP000728              | Denmark <sup>a</sup>        | 4.01                       | 28.3         | S000891606, S000891608, S000891610,<br>S000891612, S000891614, S000891616,<br>S000891618, S000891621, S000891623,<br>S002287184, S002287265, S002287727,<br>S002288829, S002288840, S002289298,<br>S002289587, S002290679, S002290804                                                       | 52.05 -<br>52.60 | 0.53                                           | 0.06 -<br>0.39 | 18                                         |
| 657,<br>CP001083                    | Texas,<br>US <sup>f</sup>   | 4.26                       | 28.0         | S001416080, S001416082, S001416084,<br>S001416086, S001416088, S001416090,<br>S001416092, S001416095, S001416097,<br>S002287409, S002287812, S002289183,<br>S002289899, S002289967, S002290081,<br>S002290186, S002291184, S002291313                                                       | 51.98 -<br>52.53 | 0.59                                           | 0.13 -<br>0.39 | 18                                         |
| Kyoto,<br>CP001581                  | Japan <sup>e</sup>          | 4.16                       | 28.2         | S001350513, S001350515, S001350516,<br>S001350517, S001350518, S001350519,<br>S001350521, S001350522, S001350523,<br>S002288023, S002288706, S002288916,<br>S002288993, S002289181, S002289518,<br>S002289629, S002290216, S002290406                                                       | 52.05 -<br>52.60 | 0.59                                           | 0.06 -<br>0.46 | 18                                         |
| Loch Maree,<br>CP000962             | Scotland <sup>h</sup>       | 4.26                       | 28.1         | S001014499, S002290134, S001014494,<br>S002287648, S001014496, S002291211,<br>S001014484, S001014492, S002290255,<br>S002289199, S001014486, S001014488,<br>S001014490, S002287052, S002287399,<br>S002288157, S001014501, S002290692,                                                      | 52.18 -<br>52.73 | 0.59                                           | 0.06 -<br>0.46 | 18                                         |
| Hall,<br>CP000727                   | Unknown <sup>k</sup>        | 3.76                       | 28.2         | S000891594, S002290424, S000891592,<br>S002287900, S000891590, S002288659,<br>S000891605, S000891598, S002290087,<br>S002289150, S000891603, S002291106,<br>S000891600, S002290636, S000891596,<br>S002290871,                                                                              | 52.05 -<br>52.60 | 0.79                                           | 0.06 -<br>0.53 | 16                                         |
| ATCC<br>19397,<br>CP000726          | Unknown <sup>k</sup>        | 3.86                       | 28.2         | S000891578, S002287857, S000891576,<br>S002287510, S000891574, S002291146,<br>S000891589, S000891582, S002290387,                                                                                                                                                                           | 52.05 -<br>52.60 | 0.79                                           | 0.06 -<br>0.53 | 16                                         |

|                         |                                |      |      |                                                                                                                                 |                  |      |               |  |     |
|-------------------------|--------------------------------|------|------|---------------------------------------------------------------------------------------------------------------------------------|------------------|------|---------------|--|-----|
|                         |                                |      |      | S002290229, S000891587, S002289359,<br>S000891584, S002290093, S000891580,<br>S002288115,                                       |                  |      |               |  |     |
| BKT015925,<br>CP002410  | Sweden <sup>l</sup>            | 3.21 | 28.2 | S002441238, S002441241, S002441243,<br>S002441245, S002441247, S002441249,<br>S002441251, S002441253, S002441255,<br>S002441257 | 52.12 -<br>52.45 | 0.59 | 0.06-<br>0.39 |  | 10  |
| H04402 065,<br>FR773526 | United<br>Kingdom <sup>m</sup> | 3.92 | 28.2 | S002408083, S002408085, S002408087,<br>S002408089, S002408091, S002408093,<br>S002408095, S002408098, S002408100                | 52.26 -<br>52.53 | 0.93 | 0.06-<br>0.39 |  | 9   |
| 230613,<br>CP002011     | China <sup>a</sup>             | 4.01 | 28.3 | S002165509, S002165511, S002165507,<br>S002165513, S002165517, S002165519,<br>S002165515, S002165522, S002165524                | 52.33 -<br>52.53 | 0.26 | 0.06-<br>0.26 |  | 9   |
| Total                   |                                |      |      |                                                                                                                                 |                  |      |               |  | 212 |

<sup>a</sup>[http://www.ncbi.nlm.nih.gov/genomes/MICROBES/microbial\\_taxtree.html](http://www.ncbi.nlm.nih.gov/genomes/MICROBES/microbial_taxtree.html)

<sup>b</sup><http://rdp.cme.msu.edu/genome/>

<sup>c</sup><http://tools.neb.com/~vincze/genomes/>

<sup>d</sup>Percent variation range calculated on the basis of pair-wise comparison of *rrs* of a genome

<sup>e</sup><http://ribosome.mmg.msu.edu/rndb/search.php>

<sup>f</sup>Isolated from an infant botulism case in Texas (9).

<sup>g</sup>Associated with an infant botulism case in Japan (9).

<sup>h</sup>Isolated from a food poisoning incident in Scotland (9).

<sup>i</sup>Most likely originated from food borne botulism incident in the US (9).

<sup>j</sup>Reference *rrs* used for detecting nucleotide changes in the rest of the *rrs* sequences.

<sup>k</sup>Most likely originated from food borne botulism cases in the western US (9).

<sup>l</sup>Isolated from an poultry broilers case in Sweden (34)

<sup>m</sup>Isolated from an infant botulism case in United Kingdom. (10)

Table S2

Intra- and intergenomic heterogeneity among *rrs* of *Clostridium botulinum* strains

| RDP Accession no.                                                     | Similarity of <i>rrs</i> to other genomes                                | Heterogeneity |
|-----------------------------------------------------------------------|--------------------------------------------------------------------------|---------------|
|                                                                       | RDP Accession no. and strain                                             |               |
| <b><i>Clostridium botulinum</i> ATCC 19397 (CP000726)<sup>a</sup></b> |                                                                          |               |
| S000891574                                                            | S000891590 <b>Hall (CP000727)</b>                                        | Intergenomic  |
| S000891576                                                            | S000891592 <b>Hall (CP000727)</b>                                        | Intergenomic  |
| S000891578                                                            | S000891594 <b>Hall (CP000727)</b>                                        | Intergenomic  |
| S000891580                                                            | S000891596 <b>Hall (CP000727)</b>                                        | Intergenomic  |
| S000891582                                                            | S000891598 <b>Hall (CP000727)</b>                                        | Intergenomic  |
| S000891584                                                            | S000891600 <b>Hall (CP000727)</b>                                        | Intergenomic  |
| S000891587                                                            | S000891603 <b>Hall (CP000727)</b>                                        | Intergenomic  |
| S000891589                                                            | S000891605 <b>Hall (CP000727)</b>                                        | Intergenomic  |
| S002287857                                                            | S002290424 <b>Hall (CP000727)</b>                                        | Intergenomic  |
| S002290093                                                            | S002290636 <b>Hall (CP000727)</b>                                        | Intergenomic  |
| S002287510                                                            | S002287900 <b>Hall (CP000727)</b> S002289503 <b>ATCC 3502 (AM412317)</b> | Intergenomic  |
| S002288115                                                            | S002290871 <b>Hall (CP000727)</b> S002287580 <b>ATCC 3502 (AM412317)</b> | Intergenomic  |
| S002289359                                                            | S002291106 <b>Hall (CP000727)</b> S002287460 <b>ATCC 3502 (AM412317)</b> | Intergenomic  |
| S002290387                                                            | S002290087 <b>Hall (CP000727)</b> S002288844 <b>ATCC 3502 (AM412317)</b> | Intergenomic  |
| S002291146                                                            | S002288659 <b>Hall (CP000727)</b> S002290425 <b>ATCC 3502 (AM412317)</b> | Intergenomic  |
| S002288802                                                            | S002289150 <b>Hall (CP000727)</b> S002289360 <b>ATCC 3502 (AM412317)</b> | Intergenomic  |
|                                                                       | S002290229 <b>ATCC 19397</b>                                             | Intragenomic  |
| <b><i>C. botulinum</i> 657 (CP001083)</b>                             |                                                                          |               |
| S001416080                                                            | S001416084, S001416086                                                   | Intragenomic  |
| S001416082                                                            | S001416090                                                               | Intragenomic  |
| S002290081                                                            | S002290186                                                               | Intragenomic  |
| S002289899                                                            | S002291184, S002291313                                                   | Intragenomic  |
| <b><i>C. botulinum</i> Loch Maree (CP000962)</b>                      |                                                                          |               |
| S001014484                                                            | S001014492                                                               | Intragenomic  |
| S001014486                                                            | S001014488, S001014490                                                   | Intragenomic  |
| S002287052                                                            | S002287399, S002288157                                                   | Intragenomic  |
| S002289199                                                            | S002290255                                                               | Intragenomic  |
| <b><i>C. botulinum</i> Alaska E43 (CP001078)</b>                      |                                                                          |               |
| S001094751                                                            | S001094764, S001094768                                                   | Intragenomic  |
| S001094753                                                            | S001094760                                                               | Intragenomic  |
| S001094766                                                            | S001094772                                                               | Intragenomic  |
| S002291044                                                            | S002291294                                                               | Intragenomic  |
| S002288016                                                            | S002289948                                                               | Intragenomic  |
|                                                                       | S002290241 <b>Eklund 17B (CP001056)</b>                                  | Intergenomic  |
| S002288383                                                            | S002290286, S002290445                                                   | Intragenomic  |
| S002287743                                                            | S002289273 S002287243 <b>Eklund 17B (CP001056)</b>                       | Intergenomic  |
| <b><i>C. botulinum</i> Eklund 17B (CP001056)</b>                      |                                                                          |               |
| S001094710                                                            | S001094724                                                               | Intragenomic  |
| S001094714                                                            | S001094718                                                               | Intragenomic  |
| S001094716                                                            | S001094722                                                               | Intragenomic  |
| S002288706                                                            | S002289181, S002289518                                                   | Intragenomic  |
| S002287177                                                            | S002288548                                                               | Intragenomic  |
| S002290247                                                            | S002290368                                                               | Intragenomic  |
| S001350523                                                            | S002408083, S002408091 <b>H04402 065 (FR773526)</b>                      | Intergenomic  |
| S002290241                                                            | S002288016, S002289948 <b>Alaska E43 (CP001078)</b>                      | Interegenomic |
| S002287243                                                            | S002289273                                                               | Intragenomic  |
|                                                                       | S002287743 <b>Alaska E43 (CP001078)</b>                                  | Interegenomic |
| <b><i>C. botulinum</i> Kyoto (CP001581)</b>                           |                                                                          |               |
| S001350516                                                            | S001350518, S001350522                                                   | Intragenomic  |
| S001350517                                                            | S001014409, S001014402, S001014398 <b>Okra (CP000939)</b>                | Intergenomic  |
|                                                                       | S000891612 S000891618 <b>Langeland (CP000728)</b>                        | Intergenomic  |
|                                                                       | S002408100 <b>H04402 065 (FR773526)</b>                                  | Intergenomic  |
| S002288916                                                            | S002289495, S002289731, S002290479 <b>Okra (CP000939)</b>                | Intergenomic  |
|                                                                       | S002287265, S002289587 <b>Langeland (CP000728)</b>                       | Intergenomic  |
|                                                                       | S002290179 <b>ATCC 3502 (AM412317)</b>                                   | Intergenomic  |
| <b><i>C. botulinum</i> Okra (CP000939)</b>                            |                                                                          |               |
| S001014396                                                            | S000891606 <b>Langeland (CP000728)</b>                                   | Intergenomic  |
| S001014409                                                            | S001014402, S001014398                                                   | Intragenomic  |
|                                                                       | S001350517 <b>Kyoto (CP001581)</b>                                       | Intergenomic  |

|                                                  |                                                            |              |
|--------------------------------------------------|------------------------------------------------------------|--------------|
|                                                  | S000891612, S000891618 <b>Langeland (CP000728)</b>         | Intergenic   |
|                                                  | S002408100 <b>H04402 065 (FR773526)</b>                    | Intergenic   |
| S002289495                                       | S002289731, S002290479                                     | Intragenomic |
|                                                  | S002288916 <b>Kyoto (CP001581)</b>                         | Intergenic   |
|                                                  | S002287265, S002289587 <b>Langeland (CP000728)</b>         | Intergenic   |
|                                                  | S002290179 <b>ATCC 3502 (AM412317)</b>                     | Intergenic   |
| S002287372                                       | S002290804 <b>Langeland (CP000728)</b>                     | Intergenic   |
| <b><i>C. botulinum</i> Langeland (CP000728)</b>  |                                                            |              |
| S000891606                                       | S001014396 <b>Okra (CP000939)</b>                          | Intergenic   |
| S000891621                                       | S000891623                                                 | Intragenomic |
| S002290804                                       | S002287372 <b>Okra (CP000939)</b>                          | Intergenic   |
| S002287265                                       | S002289587                                                 | Intragenomic |
|                                                  | S002288916 <b>Kyoto (CP001581)</b>                         | Intergenic   |
|                                                  | S002289495, S002289731, S002290479 <b>Okra (CP000939)</b>  | Intergenic   |
|                                                  | S002290179 <b>ATCC 3502 (AM412317)</b>                     | Intergenic   |
| S002288829                                       | S002288840                                                 | Intragenomic |
| S000891612                                       | S000891618                                                 | Intragenomic |
|                                                  | S001014398 S001014402 S001014409 <b>Okra (CP000939)</b>    | Intergenic   |
|                                                  | S001350517 <b>Kyoto (CP001581)</b>                         | Intergenic   |
|                                                  | S002408100                                                 | Intragenomic |
| <b><i>C. botulinum</i> ATCC 3502 (AM412317)</b>  |                                                            |              |
| S000858484                                       | S000858493                                                 | Intragenomic |
| S002289503                                       | S002287510 <b>ATCC 19397 (CP000726)</b>                    | Intergenic   |
|                                                  | S002287900 <b>Hall (CP000727)</b>                          | Intergenic   |
| S002290425                                       | S002291146 <b>ATCC 19397 (CP000726)</b>                    | Intergenic   |
|                                                  | S002288659 <b>Hall (CP000727)</b>                          | Intergenic   |
| S002288844                                       | S002290387 <b>ATCC 19397 (CP000726)</b>                    | Intergenic   |
|                                                  | S002290087 <b>Hall (CP000727)</b>                          | Intergenic   |
| S002287580                                       | S002288115 <b>ATCC 19397 (CP000726)</b>                    | Intergenic   |
|                                                  | S002290871 <b>Hall (CP000727)</b>                          | Intergenic   |
| S002287460                                       | S002289359 <b>ATCC 19397 (CP000726)</b>                    | Intergenic   |
|                                                  | S002291106 <b>Hall (CP000727)</b>                          | Intergenic   |
| S002289360                                       | S002288802                                                 | Intragenomic |
|                                                  | S002290229 <b>ATCC 19397 (CP000726)</b>                    | Intergenic   |
|                                                  | S002289150 <b>Hall (CP000727)</b>                          | Intergenic   |
| S002290179                                       | S002289495, S002289731, S002290479 <b>Okra (CP000939)</b>  | Intergenic   |
|                                                  | S002287265 S002289587 <b>Langeland (CP000728)</b>          | Intergenic   |
|                                                  | S002288916 <b>Kyoto (CP001581)</b>                         | Intergenic   |
| S002288802                                       | S002289360                                                 | Intragenomic |
| <b><i>C. botulinum</i> 230613 (CP002011)</b>     |                                                            |              |
| S002165507                                       | S002165509, S002165511, S002165513, S002165517, S002165519 | Intragenomic |
| S002165522                                       | S002165524                                                 | Intragenomic |
| <b><i>C. botulinum</i> BKT015925 (CP002410)</b>  |                                                            |              |
| S002441238                                       | S002441249, S002441257                                     | Intragenomic |
| <b><i>C. botulinum</i> H04402 065 (FR773526)</b> |                                                            |              |
| S002408083                                       | S002408091                                                 | Intragenomic |
|                                                  | S001350523 <b>Kyoto (CP001581)</b>                         | Intergenic   |
| S002408100                                       | S001014398, S001014402, S001014409 <b>Okra (CP000939)</b>  | Intergenic   |
|                                                  | S001350517 <b>Kyoto (CP001581)</b>                         | Intergenic   |
|                                                  | S000891612, S000891618 <b>Langeland (CP000728)</b>         | Intergenic   |

<sup>a</sup>All the 16 *rrs* of *C. botulinum* ATCC 19397 CP000726) and Hall (CP000727) were similar with respect to their nucleotide sequences.



**Table S3**  
List of Restriction Endonucleases used in this study

| Enzyme with generate recognition         |                                                                                                                                                                                                                                                                                                                                                                                                                                                                                                                                                                                                                                                                                                                                                                                                                                                                                                                                                                                                                                                                                                                                                                                                                                           |                  |
|------------------------------------------|-------------------------------------------------------------------------------------------------------------------------------------------------------------------------------------------------------------------------------------------------------------------------------------------------------------------------------------------------------------------------------------------------------------------------------------------------------------------------------------------------------------------------------------------------------------------------------------------------------------------------------------------------------------------------------------------------------------------------------------------------------------------------------------------------------------------------------------------------------------------------------------------------------------------------------------------------------------------------------------------------------------------------------------------------------------------------------------------------------------------------------------------------------------------------------------------------------------------------------------------|------------------|
| Cutters                                  | RE with recognition site                                                                                                                                                                                                                                                                                                                                                                                                                                                                                                                                                                                                                                                                                                                                                                                                                                                                                                                                                                                                                                                                                                                                                                                                                  | Total            |
| 4 base cutters                           | AciI(C'CGC), AluI(AG'CT), BfaI( C'TAG), BstKTI(GAT'C), BstUI(CG'CG), Csp6I(G'TAC), DpnI(GA'TC), FatI( 'CATG), HaeIII(GG'CC), HhaI(GCG'C), HinPI('CGC), HpaII(C'CGG), HpyCH4IV(A'CGT), HpyCH4V(TG'CA), MboI('GATC), MseI(T'TAA), NlaIII(CATG), RsaI(GT'AC), TaiI(ACGT'), TaqI(T'CGA), Tsp509I('AATT)                                                                                                                                                                                                                                                                                                                                                                                                                                                                                                                                                                                                                                                                                                                                                                                                                                                                                                                                       | 21               |
| 5 base cutters                           | NA                                                                                                                                                                                                                                                                                                                                                                                                                                                                                                                                                                                                                                                                                                                                                                                                                                                                                                                                                                                                                                                                                                                                                                                                                                        |                  |
| 6 base cutters                           | AatII(GACGT'C), ApaI(GGGCC'C), AseI(AT'TAAT), BspEI(T'CCGGA), BsrGI(T'GTACA), BssSI(C'ACGAG), BstBI(TT'CGAA), EagI(C'GGCCC), EcoRI(G'AATTC), EcoRV(GAT'ATC), FspI(TGC'GCA), HindIII( A'AGCTT), HpaI(GTT'AAC), NruI(TCG'CGA), PmlI(CAC'GTG), PstI(TTA'TAA), PspOMI(G'GGCCC), SacII( CCGC'GG), SmaI(CCC'GGG), SnaBI(TAC'GTA), SspI(AAT'ATT), XbaI(T'CTAGA), XmaI(C'CCGGG), ZraI(GAC'GTC)                                                                                                                                                                                                                                                                                                                                                                                                                                                                                                                                                                                                                                                                                                                                                                                                                                                    | 24               |
| Large recognition site (>6 base cutters) | BbvCI(CC'TCAGC)                                                                                                                                                                                                                                                                                                                                                                                                                                                                                                                                                                                                                                                                                                                                                                                                                                                                                                                                                                                                                                                                                                                                                                                                                           | 1                |
| Enzyme with degenerate recognition       |                                                                                                                                                                                                                                                                                                                                                                                                                                                                                                                                                                                                                                                                                                                                                                                                                                                                                                                                                                                                                                                                                                                                                                                                                                           |                  |
| 4 base cutters                           | CviJI( rG'Cy)                                                                                                                                                                                                                                                                                                                                                                                                                                                                                                                                                                                                                                                                                                                                                                                                                                                                                                                                                                                                                                                                                                                                                                                                                             | 1                |
| 5 base cutters                           | AflIII( A'CryGT), AvaII(G'GwCC), BstNI(CC'wGG), DdeI(C'TnAG), Fnu4HI(GC'nGC), HinfI(G'AnTC), Hpy188I(TC'n'GA), HpyCH4III(ACn'GT), MaeIII('GTnAC), NciI(CC'sGG), PspGI('CCwGG), Sau96I(G'GnCC), ScrFI(CC'nGG), StyDI('CCnGG), TauI(GCs'G'C), TfiI(G'AwTC), TseI(G'CwGC), Tsp45I('GTsAC)                                                                                                                                                                                                                                                                                                                                                                                                                                                                                                                                                                                                                                                                                                                                                                                                                                                                                                                                                    | 18               |
| 6 base cutters                           | ApoI(r'AATTy), Aval(C'yCGrG), BanII(GrGCy'C), Bme1580I(GkGCm'C), BsaAI(yAC'GTr), BsaHI(Gr'CGyC), BsaJI(C'CnnGG), BsaWI(w'CCGGw), BsiEI(CGry'CG), BsiHKAI(GwGCw'C), Bsp12876I(GdGCh'C), BsrI(ACTGGn'), BtgI(C'CryGG), Caci(GCn'NGC), EaeI(y'GGCCr), HincII(GTy'rAC), Hpy8I(GTn'nAC), Hpy188III(TC'nnGA), MspAII(CmG'GckG), NlaIV(GGn'nCC), NspI(rCATG'y), TatI(w'GTACw)                                                                                                                                                                                                                                                                                                                                                                                                                                                                                                                                                                                                                                                                                                                                                                                                                                                                    | 22               |
| Large recognition site (>6 base cutters) | AlwI(GGATCnnnn'n), BaeI(ACnnnnGTAYCnnnnnnnnnnn'), BaeI(GrTACnnnnGTnnnnnnnnnnnn'), BbsI(GAAGACnn'n'nnn), BbvI(GCAGCnnnnnnnn'n'nnn), BceAI(ACGGCnnnnnnnnnnnn'n'n), BcgI(CGAnnnnnnTGCnnnnnnnnnnnn'), BcgI(GCAnnnnnnTCGnnnnnnnnnnnn'), BciVI(GTATCCnnnnnn'), BmrI(ACTGGGnnnnnn'), BpmI(CTGGAGnnnnnnnnnnnnnnnn'), Bpu10I(CC'TnAGC), BseMII(CTCAGnnnnnnnnnn'), BseRI(GAGGAGnnnnnnnnnn'), BsgI(GTGCAGnnnnnnnnnnnnnnnn'), BslI(CCnnnnn'nnGG), BsmI(GAATGCn'), BsmAI(GTCTCn'nnnn), BspCNI(CTCAGnnnnnnnnnn'), BspMI(ACCTGCnnnn'n'nnn), BsrDI(GCAATGnn'), BstEII( G'GTnACC), BstF5I(GGATGnn'), BtsI(GCAGTGnn'), EciI(GGCGGAnnnnnnnnnnn'), Eco57MI(CTGrAGnnnnnnnnnnnnnnnnnn'), EcoNI(CCTnn'nnnAGG), EcoO109I(rG'GnCCy), FauI(CCCGCnnnn'n'n), FokI(GGATGnnnnnnnn'n'nnn), HgaI(GACGCnnnnn'nnnnn), Hin4I(GAYnnnnnvtCnnnnnnnnnnnn'), Hin4I(GAbnnnnnrTCnnnnnnnnnnnn'), HphI(GGTGAnnnnnnnnn'), HpyF10VI(GCnnnnnn'nGC), MboII(GAAGAnnnnnnnnn'), MlyI(GAGTCnnnnn'), MnlI(CCTCnnnnnnn'), MslI(CAYnn'n'nrTG), MwoI(GCnnnnn'nnGC), PleI(GAGTCnnnn'n), SfaNI(GCATCnnnnn'nnnn), StyI(C'CwwGG), TaqII(CACCCAnnnnnnnnnnn'), TspDTI(ATGAAAnnnnnnnnnnn'), TspGWI(ACGGAnnnnnnnnnnn'), TspRI(nnCAsTGnn'), Tth111I(GACn'nnGTC), XcmI(CCAnnnnn'nnnnTGG), XmnI(GAAnn'nnTTC) | 50               |
|                                          |                                                                                                                                                                                                                                                                                                                                                                                                                                                                                                                                                                                                                                                                                                                                                                                                                                                                                                                                                                                                                                                                                                                                                                                                                                           | <b>Total</b> 137 |

<sup>a</sup>RE action sites were observable with only 137/ 241 REs initially employed.

Table S4

*In silico* Restriction Enzyme activity in *rrs* gene of *Clostridium botulinum* strains: HpyCH4III, TaqI and Tsp45I

| <i>Clostridium botulinum</i> strains <sup>a</sup>                                                                                                                           | Restriction Enzyme digestion fragments (nucleotides, nts) |     |    |     |     |     |     |             |
|-----------------------------------------------------------------------------------------------------------------------------------------------------------------------------|-----------------------------------------------------------|-----|----|-----|-----|-----|-----|-------------|
| <b>HpyCH4III</b>                                                                                                                                                            |                                                           |     |    |     |     |     |     |             |
| Alaska E43 (22/22), Eklund 17B (14/22)                                                                                                                                      | ■                                                         | 261 | ■  | 149 | ■   |     |     |             |
| Eklund 17B (8/22)                                                                                                                                                           | ■                                                         | 261 | ■  | 149 | ■   | 370 | ■   |             |
| ATCC3502 (18/18), ATCC19397/Hall (16/16), Kyoto (18/18), Langeland (18/18), Loch Maree (18/18), Okra (18/18), 657 (18/18), 230613 (9/9), H04402 065 (8/9)                   | ■                                                         | 128 | ■  | 261 | ■   | 150 | ■   | 368 ■ 184 ■ |
| H04402 065 (1/9)                                                                                                                                                            | ■                                                         | 128 | ■  | 261 | ■   | 518 | ■   | 184 ■       |
| BKT015925 (10/10)                                                                                                                                                           | ■                                                         | 128 | ■  | 261 | ■   | 151 | ■   | 565 ■       |
| <b>TaqI</b>                                                                                                                                                                 |                                                           |     |    |     |     |     |     |             |
| Alaska E43 (20/22), Eklund 17B (16/22)                                                                                                                                      | ■                                                         |     | 88 | ■   | 585 | ■   | 198 | ■ 55 ■      |
| Alaska E43 (2/22), Eklund 17B (2/22)                                                                                                                                        | ■                                                         |     | 88 | ■   | 585 | ■   | 199 | ■           |
| Eklund (4/22)                                                                                                                                                               | ■                                                         | 18  | ■  | 70  | ■   | 585 | ■   | 198 ■ 55 ■  |
| ATCC3502 (16/18), ATCC19397/Hall (16/16), Kyoto (18/18), Langeland (18/18), Loch Maree (18/18), Okra (18/18), 657 (18/18), 230613 (9/9), H04402 065 (9/9)                   | ■                                                         |     |    |     | 872 |     |     | ■           |
| BKT015925 (10/10)                                                                                                                                                           | ■                                                         |     |    |     | 879 |     |     | ■ 522 ■     |
| ATCC3502 (2/18)                                                                                                                                                             | ■                                                         |     | 90 | ■   |     | 782 | ■   |             |
| <b>Tsp45I</b>                                                                                                                                                               |                                                           |     |    |     |     |     |     |             |
| Alaska E43 (10/22)                                                                                                                                                          | ■                                                         | 9   | ■  | 371 | ■   |     |     |             |
| Eklund 17B (20/22)                                                                                                                                                          |                                                           | 9   |    | 370 | 1   |     |     |             |
| Alaska E43 (12/22), Eklund 17B (2/22)                                                                                                                                       |                                                           |     | ■  | 371 | ■   |     |     |             |
| ATCC3502 (18/18), ATCC19397/Hall (16/16), H04402 065 (9/9) Kyoto (18/18), Langeland (18/18), Loch Maree (18/18), Okra (18/18), 657 (18/18), 230613 (9/9), BKT015925 (10/10) |                                                           |     | NA |     |     |     |     |             |

Table S5

*In silico* Restriction Enzyme activity in *rrs* gene of *Clostridium botulinum* strains: BstUI, Hpy188III and HpyCH4V

| <i>Clostridium botulinum</i> strains <sup>a</sup>                                                                                                         | Restriction Enzyme digestion fragments (nucleotides, nts) |     |     |     |     |     |     |     |     |     |     |     |     |     |    |     |   |
|-----------------------------------------------------------------------------------------------------------------------------------------------------------|-----------------------------------------------------------|-----|-----|-----|-----|-----|-----|-----|-----|-----|-----|-----|-----|-----|----|-----|---|
| <b>BstUI</b>                                                                                                                                              |                                                           |     |     |     |     |     |     |     |     |     |     |     |     |     |    |     |   |
| Alaska E43 (22/22), Eklund 17B (14/22), BKT015925 (8/10)                                                                                                  | ■                                                         | 166 | ■   | 100 | ■   | 444 | ■   | 200 | ■   | 94  | ■   | 86  | ■   | 15  | ■  |     |   |
| Eklund 17B (8/22), BKT015925 (2/10)                                                                                                                       | ■                                                         | 166 | ■   | 100 | ■   | 444 | ■   | 200 | ■   | 180 | ■   | 15  | ■   |     |    |     |   |
| ATCC3502 (18/18), ATCC19397/Hall (16/16), Kyoto (18/18), Langeland (18/18), Loch Maree (18/18), Okra (18/18), 657 (18/18), H04402 065 (9/9), 230613 (9/9) | ■                                                         | 166 | ■   | 100 | ■   | 445 | ■   |     | ■   | 379 | ■   | 15  | ■   |     |    |     |   |
| <b>Hpy188III</b>                                                                                                                                          |                                                           |     |     |     |     |     |     |     |     |     |     |     |     |     |    |     |   |
| Alaska E43 (22/22), Eklund 17B (22/22)                                                                                                                    | ■                                                         |     | 502 | ■   | 96  | ■   | 88  | ■   | 261 | ■   | 76  | ■   | 274 | ■   | 86 | ■   |   |
| ATCC19397/Hall (10/16)                                                                                                                                    | ■                                                         | 308 | ■   | 196 | ■   | 96  | ■   | 88  | ■   | 337 | ■   | 274 | ■   |     |    |     |   |
| ATCC19397/Hall (6/16), ATCC3502 (4/18), H04402 065 (9/9), Kyoto (18/18), Langeland (18/18), Loch Maree (18/18), Okra (18/18), 657 (18/18), 230613 (9/9)   | ■                                                         | 57  | ■   | 249 | ■   | 196 | ■   | 96  | ■   | 88  | ■   | 337 | ■   | 274 | ■  |     |   |
| BKT015925 (10/10)                                                                                                                                         | ■                                                         | 57  | ■   | 69  | 183 | ■   | 196 | ■   | 97  | ■   | 88  | ■   | 265 | ■   | 82 | 278 | ■ |
| ATCC3502 (9/18)                                                                                                                                           | ■                                                         |     | 249 | ■   | 196 | ■   | 96  | ■   | 88  | ■   | 337 | ■   | 275 | ■   |    |     |   |
| ATCC3502 (5/18)                                                                                                                                           | ■                                                         |     |     | ■   | 196 | ■   | 96  | ■   | 88  | ■   | 337 | ■   | 274 | ■   |    |     |   |
| <b>HpyCH4V</b>                                                                                                                                            |                                                           |     |     |     |     |     |     |     |     |     |     |     |     |     |    |     |   |
| Alaska E43 (22/22), Eklund 17B (22/22)                                                                                                                    | ■                                                         | 309 | ■   | 22  | ■   | 217 | ■   | 25  | ■   | 395 | ■   | 204 | ■   |     |    |     |   |
| ATCC3502 (2/18), ATCC19397/Hall (2/16), Langeland (2/18), Loch Maree (4/18), Okra (4/18), H04402 065 (3/9)                                                | ■                                                         |     | 548 | ■   | 25  | ■   | 346 | ■   | 49  | ■   | 46  | ■   | 157 | ■   | 58 | ■   |   |
| ATCC3502 (16/18), ATCC19397/Hall (14/16), Langeland (16/18), Loch Maree (14/18), Okra (14/18), 230613 (9/9), H04402 065 (6/9)                             | ■                                                         |     | 548 | ■   | 25  | ■   | 346 | ■   | 49  | ■   | 46  | ■   | 215 | ■   |    |     |   |
| Kyoto (8/9), 657 (18/18)                                                                                                                                  | ■                                                         |     | 548 | ■   | 25  | ■   | 346 | ■   | 49  | ■   | 46  | ■   | 215 | ■   |    |     |   |
| Kyoto (2/18)                                                                                                                                              | ■                                                         | 133 | ■   | 415 | ■   | 25  | ■   | 346 | ■   | 49  | ■   | 46  | ■   | 215 | ■  |     |   |
| BKT015925 (10/10)                                                                                                                                         | ■                                                         |     | 552 | ■   | 25  | ■   | 405 | ■   |     |     |     |     |     |     |    |     |   |

a: Values within parentheses are the frequency of *rrs* copies with the RE pattern out of the total number of copies in the strain.Symbol (Filled square) indicates RE site in the *rrs* gene.

Table S6

*In silico* Restriction Enzyme activity in *rrs* gene of *Clostridium botulinum* strains: Tsp509I, Hpy188I and NlaIV

| <i>Clostridium botulinum</i> strains <sup>a</sup>                                                                                                         | Restriction Enzyme digestion fragments (nucleotides, nts) |     |     |     |     |                     |
|-----------------------------------------------------------------------------------------------------------------------------------------------------------|-----------------------------------------------------------|-----|-----|-----|-----|---------------------|
| <b>Tsp509I</b>                                                                                                                                            |                                                           |     |     |     |     |                     |
| Alaska E43 (22/22), Eklund 17B (22/22)                                                                                                                    | ■                                                         | 244 | ■   | 40  | ■   | 46 ■                |
| ATCC 3502 (9/18), ATCC 19397/Hall (8/16), Langeland (9/18), Loch Maree (9/18), Okra (9/18), 657 (7/18), Kyoto (7/18), 230613 (9/9), H04402 065 (9/9)      | ■                                                         | 244 | ■   | 40  |     |                     |
| ATCC 3502 (9/18), ATCC 19397/Hall (8/16), Langeland (9/18), Loch Maree (9/18), Okra (9/18), Kyoto (7/18), 657 (9/18)                                      | ■                                                         | 644 | ■   | 244 | ■   | 40 ■                |
| Kyoto (1/18), 657 (2/18), BKT015925 (1/10)                                                                                                                | ■                                                         | 88  | ■   | 556 | ■   | 244 ■ 40 ■          |
| Kyoto (1/8), 657 (2/18)                                                                                                                                   | ■                                                         |     | ■   | 556 | ■   | 244 ■ 40            |
| Kyoto (1/8)                                                                                                                                               |                                                           |     | ■   | 461 | ■   | 244 ■ 40 ■          |
| Kyoto (1/8)                                                                                                                                               | ■                                                         | 183 | ■   | 461 | ■   | 244 ■ 40 ■          |
| BKT015925 (9/10)                                                                                                                                          | ■                                                         |     | ■   | 581 | ■   | 67 ■ 287 ■ 46 ■     |
| <b>Hpy188I</b>                                                                                                                                            |                                                           |     |     |     |     |                     |
| Alaska E43 (22/22), Eklund 17B (18/22)                                                                                                                    | ■                                                         | 338 | ■   |     | 854 | ■ 56 ■              |
| ATCC19397/Hall (2/16)                                                                                                                                     | ■                                                         | 70  | ■   | 267 | ■   | 856 ■ 56 ■          |
| ATCC3502 (16/18), ATCC19397/Hall (14/16), Kyoto (18/18), Langeland (18/18), Loch Maree (18/18), Okra (18/18), 657 (18/18), 230613 (9/9), H04402 065 (9/9) | ■                                                         | 267 | ■   |     | 854 | ■ 56 ■              |
| ATCC3502 (2/18), Eklund 17B (4/22)                                                                                                                        | ■                                                         |     | ■   |     | 854 | ■ 56 ■              |
| BKT015925(10/10)                                                                                                                                          | ■                                                         |     | ■   | 153 | 716 | ■                   |
| <b>NlaIV</b>                                                                                                                                              |                                                           |     |     |     |     |                     |
| ATCC19397/Hall (8/16), Langeland (14/18), ATCC 3502 (12/18), ), H04402 065 (8/9)                                                                          | ■                                                         |     | 672 | ■   | 1   | ■ 524 ■             |
| ATCC19397/Hall (8/16), Langeland (4/18), ATCC 3502 (6/18), H04402 065 (1/9)                                                                               | ■                                                         | 229 | ■   | 443 | ■   | 1 ■ 524 ■           |
| 657 (18/18), 230613 (7/9), Kyoto ( 16/18), Okra (18/18)                                                                                                   | ■                                                         |     | 672 | ■   | 1   | ■ 524 ■             |
| Alaska E43 (22/22), Eklund 17B (22/22), Loch Maree (18/18)                                                                                                | ■                                                         | 229 | ■   | 443 | ■   | 1 ■                 |
| Kyoto(2/18), 230613 (2/9)                                                                                                                                 | ■                                                         | 229 | ■   | 443 | ■   | 1 ■                 |
| BKT015925(10/10)                                                                                                                                          |                                                           | 230 | ■   | 356 | ■   | 14 ■ 76 ■ 1 ■ 536 ■ |

a: Values within parentheses are the frequency of *rrs* copies with the RE pattern out of the total number of copies in the strain. Symbol (Filled square) indicates RE site in the *rrs* gene.

**Table S7.**

**Affect on restriction enzyme sites in *rrs* of sequenced genomes of different *Clostridium botulinum* strains due to single nucleotide polymorphism.**

| <i>rrs C. botulinum</i>                                  | Nucleotide substitution | Restriction Enzyme             |              |          |           |
|----------------------------------------------------------|-------------------------|--------------------------------|--------------|----------|-----------|
|                                                          |                         | Name and sequence <sup>a</sup> | No. of sites |          | Change    |
|                                                          |                         |                                | Pre - S      | Post - S |           |
| <b><i>Clostridium botulinum</i> Langeland (CP000728)</b> |                         |                                |              |          |           |
| S000891614                                               | 67G>A                   | AluI - (AG'CT)                 | 5            | 4        | -1        |
|                                                          | 67G>A                   | HindIII - (A'AGCTT)            | 1            | 0        | -1        |
|                                                          | 67G>A,<br>1420G>A       | CviJI - (rG'Cy)                | 27           | 25       | -2        |
|                                                          | 1420G>A                 | NlaIV - (GGn'nCC)              | 4            | 4        | 0         |
| S000891616                                               | 1420G>A                 | CviJI - (rG'Cy)                | 27           | 26       | -1        |
|                                                          | 1420G>A                 | NlaIV - (GGn'nCC)              | 4            | 4        | 0         |
| S000891606                                               | 1420G>A                 | CviJI - (rG'Cy)                | 27           | 26       | -1        |
|                                                          | 1420G>A                 | NlaIV - (GGn'nCC)              | 4            | 4        | 0         |
| S000891610                                               | 1220 C>T                | HpyCH4V - (TG'CA )             | 7            | 8        | +1        |
| S002287184                                               | <b>1227C&gt;T</b>       | HpyCH4V - (TG'CA )             | 7            | 8        | +1        |
| S000891621                                               | 67G>A                   | AluI - (AG'CT)                 | 5            | 4        | -1        |
|                                                          | 67G>A                   | CviJI - (rG'Cy)                | 27           | 26       | -1        |
|                                                          | 67G>A                   | HindIII - (A'AGCTT)            | 1            | 0        | -1        |
|                                                          | 435A>G,<br>454T>C       | BfaI - (C'TAG)                 | 8            | 6        | -2        |
|                                                          | 454T>C                  | Acc65I - (G'GTACC)             | 0            | 1        | +1, Novel |
|                                                          | 454T>C                  | BanI - (G'GyrCC)               | 0            | 1        | +1, Novel |
|                                                          | 454T>C                  | NlaIV - (GGn'nCC)              | 4            | 5        | +1        |
| S000891623                                               | 67G>A                   | AluI - (AG'CT)                 | 5            | 4        | -1        |
|                                                          | 67G>A                   | CviJI - (rG'Cy)                | 27           | 26       | -1        |
|                                                          | 67G>A                   | HindIII - (A'AGCTT)            | 1            | 0        | -1        |
|                                                          | 435A>G,<br>454T>C       | BfaI - (C'TAG)                 | 8            | 6        | -2        |
|                                                          | 454T>C                  | Acc65I - (G'GTACC)             | 0            | 1        | +1, Novel |
|                                                          | 454T>C                  | BanI - (G'GyrCC)               | 0            | 1        | +1, Novel |
|                                                          | 454T>C                  | NlaIV - (GGn'nCC)              | 4            | 5        | +1        |
| S002288829                                               | 461T>C                  | KpnI - (GGTAC'C)               | 0            | 1        | +1, Novel |
|                                                          | 461T>C                  | BfaI - (C'TAG)                 | 8            | 6        | -2        |
|                                                          | 461T>C                  | Acc65I - (G'GTACC)             | 0            | 1        | +1, Novel |
|                                                          | 461T>C                  | BanI - (G'GyrCC)               | 0            | 1        | +1, Novel |
|                                                          | 461T>C                  | NlaIV - (GGn'nCC)              | 4            | 5        | +1        |
| S002288840                                               | 461T>C                  | KpnI - (GGTAC'C)               | 0            | 1        | +1, Novel |
|                                                          | 461T>C                  | BfaI - (C'TAG)                 | 8            | 6        | -2        |
|                                                          | 461T>C                  | Acc65I - (G'GTACC)             | 0            | 1        | +1, Novel |
|                                                          | 461T>C                  | BanI - (G'GyrCC)               | 0            | 1        | +1, Novel |
|                                                          | 461T>C                  | NlaIV - (GGn'nCC)              | 4            | 5        | +1        |
| S002288829                                               | 461T>C                  | KpnI - (GGTAC'C)               | 0            | 1        | +1, Novel |
|                                                          | 461T>C                  |                                |              |          |           |
|                                                          | 74G>A                   | AluI - (AG'CT)                 | 5            | 4        | -1        |
|                                                          | 74G>A                   | CviJI - (rG'Cy)                | 27           | 26       | -1        |
|                                                          | 74G>A                   | HindIII - (A'AGCTT)            | 1            | 0        | -1        |
| S002288840                                               | 74G>A                   | AluI - (AG'CT)                 | 5            | 4        | -1        |
|                                                          | 74G>A                   | CviJI - (rG'Cy)                | 27           | 26       | -1        |
|                                                          | 74G>A                   | HindIII - (A'AGCTT)            | 1            | 0        | -1        |
| S002290679                                               | 74G>A                   | AluI - (AG'CT)                 | 5            | 4        | -1        |
|                                                          | 74G>A                   | CviJI - (rG'Cy)                | 27           | 26       | -1        |
|                                                          | 74G>A                   | HindIII - (A'AGCTT)            | 1            | 0        | -1        |
| S002288829                                               | 442A>G                  | BfaI - (C'TAG)                 | 8            | 6        | -2        |
| S002288840                                               | 442A>G                  | BfaI - (C'TAG)                 | 8            | 6        | -2        |
| S002290804                                               | 1427G>A                 | CviJI - (rG'Cy)                | 27           | 26       | -1        |
|                                                          | 1427G>A                 | NlaIV - (GGn'nCC)              | 4            | 4        | 0         |
| S002290679                                               | 1427G>A                 | CviJI - (rG'Cy)                | 27           | 26       | -1        |
|                                                          | 1427G>A                 | NlaIV - (GGn'nCC)              | 4            | 4        | 0         |

|                                                          |                   |                           |                   |    |           |
|----------------------------------------------------------|-------------------|---------------------------|-------------------|----|-----------|
| S002289298                                               | 1427G>A           | CviJI - (rG'Cy)           | 27                | 26 | -1        |
|                                                          | 1427G>A           | NlaIV - (GGn'nCC)         | 4                 | 4  | 0         |
| <b><i>Clostridium botulinum</i> ATCC 3502 (AM412317)</b> |                   |                           |                   |    |           |
| S000858486                                               | 223G>A            | MaeIII - ('GTnAC)         | 9                 | 8  | -1        |
| S000858478                                               | 40G>A             | AluI - (AG'CT)            | 5                 | 4  | -1        |
|                                                          | 40G>A             | CviJI - (rG'Cy)           | 24                | 23 | -1        |
|                                                          | 40G>A             | HindIII - (A'AGCTT)       | 1                 | 0  | -1        |
| S000858480                                               | 52G>A             | Hpy188III - (TC'nn_GA)    | 6                 | 7  | +1        |
| S000858491                                               | 40G>A             | AluI - (AG'CT)            | 5                 | 4  | -1        |
|                                                          | 40G>A             | CviJI - (rG'Cy)           | 24                | 23 | -1        |
|                                                          | 40G>A             | HindIII - (A'AGCTT)       | 1                 | 0  | -1        |
|                                                          | 52G>A             | Hpy188III - (TC'nnGA)     | 6                 | 7  | +1        |
|                                                          | 408A>G,<br>427T>C | BfaI - (C'TAG)            | 8                 | 6  | -2        |
|                                                          | 427T>C            | NlaIV - (GGn'nCC)         | 4                 | 5  | +1        |
|                                                          | 427T>C            | KpnI - (GGTAC'C)          | 0                 | 1  | +1, Novel |
|                                                          | 1193C>T           | HpyCH4V - (TG'CA)         | 7                 | 8  | +1        |
| S000858488                                               | 52G>A             | Hpy188III - (TC'nnGA)     | 6                 | 7  | +1        |
|                                                          | 118C>T            | BstBI - (TT'CGAA)         | 1                 | 2  | +1        |
|                                                          | 118C>T            | TaqI - (T'CGA)            | 2                 | 3  | +1        |
|                                                          | 118C>T            | Hpy188I - (TCn'GA)        | 4                 | 3  | -1        |
|                                                          | 363C>T            | Fnu4HI - (GC'nGC)         | 14                | 13 | -1        |
|                                                          | 363C>T            | Acil - (C'CGC)            | 20                | 19 | -1        |
|                                                          | 363C>T            | TauI - (GCsG'C)           | 8                 | 7  | -1        |
|                                                          | 363C>T            | HpyCH4IV - (A'CGT)        | 6                 | 7  | +1        |
|                                                          | 363C>T            | TaiI - (ACGT')            | 6                 | 7  | +1        |
|                                                          | 363C>T            | Hpy99I - (CGwCG')         | 0                 | 1  | +1, Novel |
|                                                          | 408A>G,<br>427T>C | BfaI - (C'TAG)            | 8                 | 6  | -2        |
|                                                          | 427T>C            | NlaIV - (GGn'nCC)         | 4                 | 5  | +1        |
|                                                          | 427T>C            | KpnI - (GGTAC'C)          | 0                 | 1  | +1, Novel |
|                                                          | S002290042        | 152C>T                    | BstBI - (TT'CGAA) | 1  | 2         |
| 152C>T                                                   |                   | TaqI - (T'CGA)            | 2                 | 3  | +1        |
| 152C>T                                                   |                   | Hpy188I - (TCn'GA)        | 4                 | 3  | -1        |
| S002289503                                               | 74G>A             | AluI - (AG'CT)            | 5                 | 4  | -1        |
|                                                          | 74G>A             | CviJI - (rG'Cy)           | 24                | 23 | -1        |
|                                                          | 74G>A             | HindIII - (A'AGCTT)       | 1                 | 0  | -1        |
| S002287460                                               | 74G>A             | AluI - (AG'CT)            | 5                 | 4  | -1        |
|                                                          | 74G>A             | CviJI - (rG'Cy)           | 24                | 23 | -1        |
|                                                          | 74G>A             | HindIII - (A'AGCTT)       | 1                 | 0  | -1        |
| S002287580                                               | 129 G>A           | BspMI - (ACCTGCnnnn'hnnn) | 2                 | 1  | -1        |
| S000858482                                               | 95G>A             | BspMI - (ACCTGCnnnn'hnnn) | 2                 | 1  | -1        |
| S002288844                                               | 257 G>A           | MaeIII - ('GTnAC)         | 9                 | 8  | -1        |
| S002287460                                               | 440 A>G           | BfaI - (C'TAG)            | 8                 | 6  | -2        |
| S000858488                                               | 440 A>G           | BfaI - (C'TAG)            | 8                 | 6  | -2        |
| S002287580                                               | 440 A>G           | BfaI - (C'TAG)            | 8                 | 6  | -2        |
| S002287580                                               | 461T>C            | BfaI - (C'TAG)            | 8                 | 6  | -2        |
| S002290042                                               | 461T>C            | BfaI - (C'TAG)            | 8                 | 6  | -2        |
| S002287460                                               | 461T>C            | BfaI - (C'TAG)            | 8                 | 6  | -2        |
| S002290042                                               | 397C>T            | Fnu4HI - (GC'nGC)         | 14                | 13 | -1        |
|                                                          | 397C>T            | Acil - (C'CGC)            | 20                | 19 | -1        |
|                                                          | 397C>T            | TauI - (GCsG'C)           | 8                 | 7  | -1        |
|                                                          | 397C>T            | HpyCH4IV - (A'CGT)        | 6                 | 7  | +1        |
|                                                          | 397C>T            | TaiI - (ACGT')            | 6                 | 7  | +1        |
|                                                          | 397C>T            | Hpy99I - (CGwCG')         | 0                 | 1  | +1, Novel |
| <b><i>Clostridium botulinum</i> 657 (CP001083)</b>       |                   |                           |                   |    |           |
| S001416082                                               | 84G>A             | Tsp509I - ('AATT)         | 3                 | 4  | +1        |
| S001416090                                               | 84G>A             | Tsp509I - ('AATT)         | 3                 | 4  | +1        |
| S001416088                                               | 80A>G             | EcoNI - (CCTnn'n_nnAGG)   | 2                 | 3  | +1        |
|                                                          | 80A>G             | BsII - (CCnn_nnn'nnGG)    | 7                 | 8  | +1        |
| S001416095                                               | 222A>G            | AvaII - (G'GwCC)          | 2                 | 1  | -1        |
|                                                          | 222A>G            | Sau96I - (G'GnCC)         | 5                 | 6  | +1        |
|                                                          | 222A>G            | NlaIV - (GGn'nCC)         | 4                 | 4  | 0         |

|                                                                       |         |                          |    |    |           |
|-----------------------------------------------------------------------|---------|--------------------------|----|----|-----------|
|                                                                       | 222A>G  | PspOMI – (G'GGCCC)       | 1  | 2  | +1        |
|                                                                       | 222A>G  | CviJI – (rG'Cy)          | 26 | 27 | +1        |
|                                                                       | 222A>G  | HaeIII – (GG'CC)         | 4  | 5  | +1        |
|                                                                       | 222A>G  | ApaI – (GGGCC'C)         | 1  | 2  | +1        |
|                                                                       | 222A>G  | BanII – (GrGCy'C)        | 1  | 2  | +1        |
|                                                                       | 222A>G  | Bme1580I – (GkGCm'C)     | 1  | 2  | +1        |
|                                                                       | 222A>G  | Bsp1286I – (GdGCh'C)     | 2  | 3  | +1        |
|                                                                       | 222A>G  | Cac8I – (GCn'nGC)        | 5  | 6  | +1        |
| S001416092                                                            | 254C>T  | MaeIII – ('GTnAC)        | 9  | 8  | -1        |
|                                                                       | 997C>T  | XmnI – (GAAnn'nnTTC)     | 3  | 2  | -1        |
|                                                                       | 1420A>G | NlaIV – (GGn'nCC)        | 4  | 4  | 0         |
|                                                                       | 1420A>G | CviJI – (rG'Cy)          | 26 | 27 | +1        |
|                                                                       | 1420A>G | Cac8I – (GCn'nGC)        | 5  | 6  | +1        |
| S001416097                                                            | 254C>T  | MaeIII – ('GTnAC)        | 9  | 8  | -1        |
| S002289967                                                            | 229A>G  | AvaII – (G'GwCC)         | 2  | 1  | -1        |
|                                                                       | 229A>G  | Sau96I – (G'GnCC)        | 5  | 6  | +1        |
|                                                                       | 229A>G  | NlaIV – (GGn'nCC)        | 4  | 4  | 0         |
|                                                                       | 229A>G  | PspOMI – (G'GGCCC)       | 1  | 2  | +1        |
|                                                                       | 229A>G  | CviJI – (rG'Cy)          | 26 | 27 | +1        |
|                                                                       | 229A>G  | HaeIII – (GG'CC)         | 4  | 5  | +1        |
|                                                                       | 229A>G  | ApaI – (GGGCC'C)         | 1  | 2  | +1        |
|                                                                       | 229A>G  | BanII – (GrGCy'C)        | 1  | 2  | +1        |
|                                                                       | 229A>G  | Bme1580I – (GkGCm'C)     | 1  | 2  | +1        |
|                                                                       | 229A>G  | Bsp1286I – (GdGCh'C)     | 2  | 3  | +1        |
|                                                                       | 229A>G  | Cac8I – (GCn'nGC)        | 5  | 6  | +1        |
| S002289183                                                            | 1427A>G | NlaIV – (GGn'nCC)        | 4  | 4  | 0         |
|                                                                       | 1427A>G | CviJI – (rG'Cy)          | 26 | 27 | +1        |
|                                                                       | 1427A>G | Cac8I – (GCn'nGC)        | 5  | 6  | +1        |
| S002287409                                                            | 87G>A   | EcoNI – (CC'Tnn'n_nAGG)  | 2  | 3  | +1        |
|                                                                       | 87G>A   | BsII – (CCnn_nnn'nnGG)   | 7  | 8  | +1        |
| S002290186                                                            | 91G>A   | Tsp509I – ('AATT)        | 3  | 4  | +1        |
| S002290081                                                            | 91G>A   | Tsp509I – ('AATT)        | 3  | 4  | +1        |
| S002287812                                                            | 261C>T  | MaeIII – ('GTnAC)        | 9  | 8  | -1        |
| S002289183                                                            | 261C>T  | MaeIII – ('GTnAC)        | 9  | 8  | -1        |
| S002289183                                                            | 1004C>T | XmnI – (GAAnn'nnTTC)     | 3  | 2  | -1        |
| <b><i>Clostridium botulinum</i> Alaska E43 (CP001078)<sup>b</sup></b> |         |                          |    |    |           |
| S001094760                                                            | 993G>A  | MaeIII – ('GTnAC)        | 4  | 6  | +2        |
|                                                                       | 993G>A  | Tsp45I – ('GTsAC)        | 1  | 3  | +2        |
|                                                                       | 993G>A  | AleI – (CACnn'nnGTG)     | 0  | 1  | +1, Novel |
|                                                                       | 993G>A  | MslII – (CAynn'nrrTG)    | 0  | 1  | +1, Novel |
|                                                                       | 1000C>T | HphI – (GGTGAnnnnnnn_n') | 6  | 7  | +1        |
| S001094753                                                            | 993G>A  | MaeIII – ('GTnAC)        | 4  | 6  | +2        |
|                                                                       | 993G>A  | Tsp45I – ('GTsAC)        | 1  | 3  | +2        |
|                                                                       | 993G>A  | AleI – (CACnn'nnGTG)     | 0  | 1  | +1, Novel |
|                                                                       | 993G>A  | MslII – (CAynn'nrrTG)    | 0  | 1  | +1, Novel |
|                                                                       | 1000C>T | HphI – (GGTGAnnnnnnn_n') | 6  | 7  | +1        |
| S001094755                                                            | 983C>A  | TaqI – (T'CGA)           | 5  | 4  | -1        |
|                                                                       | 993G>A  | MaeIII – ('GTnAC)        | 4  | 6  | +2        |
|                                                                       | 993G>A  | Tsp45I – ('GTsAC)        | 1  | 3  | +2        |
|                                                                       | 993G>A  | AleI – (CACnn'nnGTG)     | 0  | 1  | +1, Novel |
|                                                                       | 993G>A  | MslII – (CAynn'nrrTG)    | 0  | 1  | +1, Novel |
|                                                                       | 1000C>T | HphI – (GGTGAnnnnnnn_n') | 6  | 7  | +1        |
| S001094758                                                            | 993G>A  | MaeIII – ('GTnAC)        | 4  | 6  | +2        |
|                                                                       | 993G>A  | Tsp45I – ('GTsAC)        | 1  | 3  | +2        |
|                                                                       | 993G>A  | AleI – (CACnn'nnGTG)     | 0  | 1  | +1, Novel |
|                                                                       | 993G>A  | MslII – (CAynn'nrrTG)    | 0  | 1  | +1, Novel |
|                                                                       | 1000C>T | HphI – (GGTGAnnnnnnn_n') | 6  | 7  | +1        |
| S001094762                                                            | 993G>A  | MaeIII – ('GTnAC)        | 4  | 6  | +2        |
|                                                                       | 993G>A  | Tsp45I – ('GTsAC)        | 1  | 3  | +2        |
|                                                                       | 993G>A  | AleI – (CACnn'nnGTG)     | 0  | 1  | +1, Novel |
|                                                                       | 993G>A  | MslII – (CAynn'nrrTG)    | 0  | 1  | +1, Novel |
|                                                                       | 1000C>T | HphI – (GGTGAnnnnnnn_n') | 6  | 7  | +1        |
| S002289948 <sup>c</sup>                                               | 999G>A  | MaeIII – ('GTnAC)        | 4  | 6  | +2        |
|                                                                       | 999G>A  | Tsp45I – ('GTsAC)        | 1  | 3  | +2        |

|                                                                             |                    |                                                |        |        |           |
|-----------------------------------------------------------------------------|--------------------|------------------------------------------------|--------|--------|-----------|
|                                                                             | 999G>A             | AleI – (CACnn'nnGTG)                           | 0      | 1      | +1, Novel |
|                                                                             | 999G>A             | MslI – (CAynn'nrrTG)                           | 0      | 1      | +1, Novel |
| S002290927                                                                  | 999G>A             | MaeIII – ('GTnAC)                              | 4      | 6      | +2        |
|                                                                             | 999G>A             | Tsp45I – ('GTsAC)                              | 1      | 3      | +2        |
|                                                                             | 999G>A             | AleI – (CACnn'nnGTG)                           | 0      | 1      | +1, Novel |
|                                                                             | 999G>A             | MslI – (CAynn'nrrTG)                           | 0      | 1      | +1, Novel |
| S002287743                                                                  | 999G>A             | MaeIII – ('GTnAC)                              | 4      | 6      | +2        |
|                                                                             | 999G>A             | Tsp45I – ('GTsAC)                              | 1      | 3      | +2        |
|                                                                             | 999G>A             | AleI – (CACnn'nnGTG)                           | 0      | 1      | +1, Novel |
|                                                                             | 999G>A             | MslI – (CAynn'nrrTG)                           | 0      | 1      | +1, Novel |
| S002288016                                                                  | 999G>A             | MaeIII – ('GTnAC)                              | 4      | 6      | +2        |
|                                                                             | 999G>A             | Tsp45I – ('GTsAC)                              | 1      | 3      | +2        |
|                                                                             | 999G>A             | AleI – (CACnn'nnGTG)                           | 0      | 1      | +1, Novel |
|                                                                             | 999G>A             | MslI – (CAynn'nrrTG)                           | 0      | 1      | +1, Novel |
| S002288105                                                                  | 999G>A             | MaeIII – ('GTnAC)                              | 4      | 6      | +2        |
|                                                                             | 999G>A             | Tsp45I – ('GTsAC)                              | 1      | 3      | +2        |
|                                                                             | 999G>A             | AleI – (CACnn'nnGTG)                           | 0      | 1      | +1, Novel |
|                                                                             | 999G>A             | MslI – (CAynn'nrrTG)                           | 0      | 1      | +1, Novel |
| S002288105                                                                  | 989C>A             | TaqI – (T'CGA)                                 | 5      | 4      | -1        |
| <b><i>Clostridium botulinum</i> ATCC 19397 (CP000726) / Hall (CP000727)</b> |                    |                                                |        |        |           |
| S000891582 / S000891598                                                     | 250G>A             | MaeIII – ('GTnAC)                              | 9      | 8      | -1        |
| S000891576 / S000891592                                                     | 67G>A              | AluI - (AG'CT)                                 | 5      | 4      | -1        |
|                                                                             | 67G>A              | HindIII – (A'AGCTT)                            | 1      | 0      | -1        |
|                                                                             | 67G>A              | CviJI - (rG'Cy)                                | 27     | 25     | -2        |
| S000891578 / S000891594                                                     | 79G>A              | Hpy188III – (TC'nnGA)                          | 7      | 8      | +1        |
|                                                                             | 435A>G<br>454T>C   | BfaI – (C'TAG)                                 | 8      | 6      | -2        |
|                                                                             | 454T>C             | Acc65I – (G'GTACC)                             | 0      | 1      | +1, Novel |
|                                                                             | 454T>C             | BanI – (G'GyrCC)                               | 0      | 1      | +1, Novel |
|                                                                             | 454T>C             | NlaIV – (GGn'nCC)                              | 4      | 5      | +1        |
|                                                                             | 454T>C             | KpnI – (GGTAC'C)                               | 0      | 1      | +1, Novel |
| S000891587 / S000891603                                                     | 67G>A              | HindIII – (A'AGCTT)                            | 1      | 0      | -1        |
|                                                                             | 79G>A              | Hpy188III – (TC'nnGA)                          | 7      | 8      | +1        |
|                                                                             | 435A>G,<br>454T>C  | BfaI – (C'TAG)                                 | 8      | 6      | -2        |
|                                                                             | 454T>C             | Acc65I – (G'GTACC)                             | 0      | 1      | +1, Novel |
|                                                                             | 454T>C             | BanI – (G'GyrCC)                               | 0      | 1      | +1, Novel |
|                                                                             | 454T>C             | NlaIV – (GGn'nCC)                              | 4      | 5      | +1        |
|                                                                             | 454T>C             | KpnI – (GGTAC'C)                               | 0      | 1      | +1, Novel |
|                                                                             | 1220C>T<br>1220C>T | HgaI – (GACGCnnnnn'nnnnn)<br>HpyCH4V - (TG'CA) | 3<br>7 | 2<br>8 | -1<br>+1  |
| S000891584 / S000891600                                                     | 67G>A              | HindIII – (A'AGCTT)                            | 1      | 0      | -1        |
|                                                                             | 78G>A,<br>79G>A    | Hpy188I – (TC_n'GA)                            | 4      | 5      | +1        |
|                                                                             | 454T>C             | Acc65I – (G'GTACC)                             | 0      | 1      | +1, Novel |
|                                                                             | 454T>C             | BanI – (G'GyrCC)                               | 0      | 1      | +1, Novel |
|                                                                             | 454T>C             | NlaIV – (GGn'nCC)                              | 4      | 5      | +1        |
|                                                                             | 454T>C             | KpnI – (GGTAC'C)                               | 0      | 1      | +1, Novel |
| S000891580 / S000891596                                                     | 79G>A              | Hpy188III – (TC'nnGA)                          | 7      | 8      | +1        |
|                                                                             | 122G>A             | BspMI – (ACCTGCnnnn'nnnn)                      | 2      | 1      | -1        |
|                                                                             | 454T>C             | Acc65I – (G'GTACC)                             | 0      | 1      | +1, Novel |
|                                                                             | 454T>C             | BfaI                                           | 8      | 6      | -2        |
|                                                                             | 454T>C             | BanI – (G'GyrCC)                               | 0      | 1      | +1, Novel |
|                                                                             | 454T>C             | NlaIV – (GGn'nCC)                              | 4      | 5      | +1        |
|                                                                             | 454T>C             | KpnI – (GGTAC'C)                               | 0      | 1      | +1, Novel |
| S002289359                                                                  | 1227C>T            | HgaI – (GACGCnnnnn'nnnnn)                      | 3      | 2      | -1        |
|                                                                             | 1227C>T            | HpyCH4V - (TG'CA)                              | 7      | 8      | +1        |
| S002287857 <sup>c</sup>                                                     | 461T>C             | BfaI – (C'TAG)                                 | 8      | 6      | -2        |
|                                                                             | 461T>C             | Acc65I – (G'GTACC)                             | 0      | 1      | +1, Novel |
|                                                                             | 461T>C             | BanI – (G'GyrCC)                               | 0      | 1      | +1, Novel |
|                                                                             | 461T>C             | NlaIV – (GGn'nCC)                              | 4      | 5      | +1        |



|                                                           |                    |                            |    |    |           |
|-----------------------------------------------------------|--------------------|----------------------------|----|----|-----------|
|                                                           | 461T>C             | KpnI – (GGTAC'C)           | 0  | 1  | +1, Novel |
| S002288115 <sup>e</sup>                                   | 461T>C             | BfaI – (C'TAG)             | 8  | 6  | -2        |
|                                                           | 461T>C             | Acc65I – (G'GTACC)         | 0  | 1  | +1, Novel |
|                                                           | 461T>C             | BanI – (G'GyrCC)           | 0  | 1  | +1, Novel |
|                                                           | 461T>C             | NlaIV – (GGn'nCC)          | 4  | 5  | +1        |
|                                                           | 461T>C             | KpnI – (GGTAC'C)           | 0  | 1  | +1, Novel |
| S002289359 <sup>e</sup>                                   | 461T>C             | BfaI – (C'TAG)             | 8  | 6  | -2        |
|                                                           | 461T>C             | Acc65I – (G'GTACC)         | 0  | 1  | +1, Novel |
|                                                           | 461T>C             | BanI – (G'GyrCC)           | 0  | 1  | +1, Novel |
|                                                           | 461T>C             | NlaIV – (GGn'nCC)          | 4  | 5  | +1        |
|                                                           | 461T>C             | KpnI – (GGTAC'C)           | 0  | 1  | +1, Novel |
| S002287857                                                | 86G>A              | Hpy188III – (TC'nnGA)      | 7  | 8  | +1        |
| S002287510 <sup>d</sup>                                   | 74G>A              | AluI – (AG'CT)             | 5  | 4  | -1        |
|                                                           | 74G>A              | HindIII – (A'AGCTT)        | 1  | 0  | -1        |
|                                                           | 74G>A              | CviJI – (rG'Cy)            | 27 | 25 | -2        |
| S002289359 <sup>d</sup>                                   | 74G>A              | AluI – (AG'CT)             | 5  | 4  | -1        |
|                                                           | 74G>A              | HindIII – (A'AGCTT)        | 1  | 0  | -1        |
|                                                           | 74G>A              | CviJI – (rG'Cy)            | 27 | 25 | -2        |
| S002290093 <sup>d</sup>                                   | 74G>A              | AluI – (AG'CT)             | 5  | 4  | -1        |
|                                                           | 74G>A              | HindIII – (A'AGCTT)        | 1  | 0  | -1        |
|                                                           | 74G>A              | CviJI – (rG'Cy)            | 27 | 25 | -2        |
| S002288115 <sup>d</sup>                                   | 129 G>A            | BspMI – (ACCTGCnnnn'n'nnn) | 2  | 1  | -1        |
| S002290387                                                | 257 G>A            | MaeIII – ('GTnAC)          | 9  | 8  | -1        |
| S002287857 <sup>d</sup>                                   | 442A>G             | BfaI – (C'TAG)             | 8  | 6  | -2        |
| S002288115 <sup>d</sup>                                   | 442A>G             | BfaI – (C'TAG)             | 8  | 6  | -2        |
| S002290093 <sup>d</sup>                                   | 442A>G             | BfaI – (C'TAG)             | 8  | 6  | -2        |
| S002289359 <sup>d</sup>                                   | 442A>G             | BfaI – (C'TAG)             | 8  | 6  | -2        |
| <b><i>Clostridium botulinum</i> Eklund 17B (CP001056)</b> |                    |                            |    |    |           |
| S001094712                                                | 211G>A             | AciI – (C'CGC)             | 20 | 19 | -1        |
|                                                           | 983C>A             | TaqI – (T'CGA)             | 5  | 4  | -1        |
| S001094703                                                | 68G>A              | AluI – (AG'CT)             | 7  | 6  | -1        |
|                                                           | 68G>A              | HindIII – (A'AGCTT)        | 1  | 0  | -1        |
|                                                           | 68G>A              | CviJI – (rG'Cy)            | 27 | 26 | -1        |
| S001094716                                                | 68G>A              | AluI – (AG'CT)             | 7  | 6  | -1        |
|                                                           | 68G>A              | HindIII – (A'AGCTT)        | 1  | 0  | -1        |
|                                                           | 68G>A              | CviJI – (rG'Cy)            | 27 | 26 | -1        |
| S001094722                                                | 68G>A              | AluI – (AG'CT)             | 7  | 6  | -1        |
|                                                           | 68G>A              | HindIII – (A'AGCTT)        | 1  | 0  | -1        |
|                                                           | 68G>A              | CviJI – (rG'Cy)            | 27 | 26 | -1        |
| S001094714                                                | 68G>A              | AluI – (AG'CT)             | 7  | 6  | -1        |
|                                                           | 68G>A              | HindIII – (A'AGCTT)        | 1  | 0  | -1        |
|                                                           | 68G>A              | CviJI – (rG'Cy)            | 27 | 26 | -1        |
|                                                           | 1232C>T            | AciI – (C'CGC)             | 20 | 19 | -1        |
|                                                           | 1232C>T            | BstUI – (CG'CG)            | 8  | 7  | -1        |
| S001094718                                                | 1232C>T            | HpyCH4III – (ACn'GT)       | 3  | 4  | +1        |
|                                                           | 68G>A              | AluI – (AG'CT)             | 7  | 6  | -1        |
|                                                           | 68G>A              | HindIII – (A'AGCTT)        | 1  | 0  | -1        |
|                                                           | 68G>A              | CviJI – (rG'Cy)            | 27 | 26 | -1        |
|                                                           | 1232C>T            | AciI – (C'CGC)             | 20 | 19 | -1        |
|                                                           | 1232C>T            | BstUI – (CG'CG)            | 8  | 7  | -1        |
|                                                           | 1232C>T            | HpyCH4III – (ACn'GT)       | 3  | 4  | +1        |
| S001094707                                                | 77G>A              | Hpy188I – (TCn'GA)         | 4  | 3  | -1        |
|                                                           | 77G>A              | BstBI – (TT'CGAA)          | 2  | 3  | +1        |
|                                                           | 77G>A              | TaqI – (T'CGA)             | 5  | 6  | +1        |
|                                                           | 993A>G             | MaeIII – ('GTnAC)          | 6  | 4  | -2        |
|                                                           | 993A>G,<br>1000T>C | Tsp45I – ('GTsAC)          | 3  | 1  | -2        |
|                                                           | 993A>G,<br>1000T>C | AleI – (CACnn'nnGTG)       | 1  | 0  | -1        |
|                                                           | 993A>G             | MslI – (CAynn'nnrTG)       | 1  | 0  | -1        |
|                                                           | 1000T>C            | MaeIII – ('GTnAC)          | 6  | 4  | -2        |
|                                                           | 1000T>C            | MslI – (CAynn'nnrTG)       | 1  | 0  | -1        |

|                                                           |          |                       |    |    |           |
|-----------------------------------------------------------|----------|-----------------------|----|----|-----------|
|                                                           | 1232C>T  | Acil – (C'CGC)        | 20 | 19 | -1        |
|                                                           | 1232C>T  | BstUI – (CG'CG)       | 8  | 7  | -1        |
|                                                           | 1232C>T  | HpyCH4III – (AC_n'GT) | 3  | 4  | +1        |
| S001094720                                                | 77G>A    | Hpy188I – (TC_n'GA)   | 4  | 3  | -1        |
|                                                           | 77G>A    | BstBI – (TT'CGAA)     | 2  | 3  | +1        |
|                                                           | 77G>A    | TaqI – (TCGA)         | 5  | 6  | +1        |
|                                                           | 1232C>T  | Acil – (C'CGC)        | 20 | 19 | -1        |
|                                                           | 1232C>T  | BstUI – (CG'CG)       | 8  | 7  | -1        |
|                                                           | 1232C>T  | HpyCH4III – (ACn'GT)  | 3  | 4  | +1        |
| S002288156                                                | 83G>A    | Hpy188I – (TCn'GA)    | 4  | 3  | -1        |
|                                                           | 83G>A    | BstBI – (TT'CGAA)     | 2  | 3  | +1        |
|                                                           | 83G>A    | TaqI – (TCGA)         | 5  | 6  | +1        |
| S002289462                                                | 1238C>T  | Acil – (C'CGC)        | 20 | 19 | -1        |
|                                                           | 1238C>T  | BstUI – (CG'CG)       | 8  | 7  | -1        |
|                                                           | 1238C>T  | HpyCH4III – (ACn'GT)  | 3  | 4  | +1        |
| S002290368                                                | 1238C>T  | Acil – (C'CGC)        | 20 | 19 | -1        |
|                                                           | 1238C>T  | BstUI – (CG'CG)       | 8  | 7  | -1        |
|                                                           | 1238C>T  | HpyCH4III – (ACn'GT)  | 3  | 4  | +1        |
| S002290247                                                | 1238C>T  | Acil – (C'CGC)        | 20 | 19 | -1        |
|                                                           | 1238C>T  | BstUI – (CG'CG)       | 8  | 7  | -1        |
|                                                           | 1238C>T  | HpyCH4III – (ACn'GT)  | 3  | 4  | +1        |
| S002288156                                                | 1238C>T  | Acil – (C'CGC)        | 20 | 19 | -1        |
|                                                           | 1238C>T  | BstUI – (CG'CG)       | 8  | 7  | -1        |
|                                                           | 1238C>T  | HpyCH4III – (ACn'GT)  | 3  | 4  | +1        |
| S002290154                                                | 74G>A    | AluI – (AG'CT)        | 7  | 6  | -1        |
|                                                           | 74G>A    | HindIII – (A'AGCTT)   | 1  | 0  | -1        |
|                                                           | 74G>A    | CviJI – (rG'Cy)       | 27 | 26 | -1        |
| S002290368                                                | 74G>A    | AluI – (AG'CT)        | 7  | 6  | -1        |
|                                                           | 74G>A    | HindIII – (A'AGCTT)   | 1  | 0  | -1        |
|                                                           | 74G>A    | CviJI – (rG'Cy)       | 27 | 26 | -1        |
| S002290247                                                | 74G>A    | AluI – (AG'CT)        | 7  | 6  | -1        |
|                                                           | 74G>A    | HindIII – (A'AGCTT)   | 1  | 0  | -1        |
|                                                           | 74G>A    | CviJI – (rG'Cy)       | 27 | 26 | -1        |
| S002287177                                                | 74G>A    | AluI – (AG'CT)        | 7  | 6  | -1        |
|                                                           | 74G>A    | HindIII – (A'AGCTT)   | 1  | 0  | -1        |
|                                                           | 74G>A    | CviJI – (rG'Cy)       | 27 | 26 | -1        |
| S002290659                                                | 218G>A   | Acil – (C'CGC)        | 20 | 19 | -1        |
| S002290659                                                | 989 C>A  | TaqI – (TCGA)         | 5  | 4  | -1        |
| S002289462                                                | 1006T>C  | Tsp45I – ('GTsAC)     | 3  | 1  | -2        |
|                                                           | 1006T>C  | AleI – (CACnn'nnGTG)  | 1  | 0  | -1        |
|                                                           | 1006T>C  | MaeIII – ('GTnAC)     | 6  | 4  | -2        |
|                                                           | 1006T>C  | MslI – (CAynn'nnrTG)  | 1  | 0  | -1        |
| <b><i>Clostridium botulinum</i> Loch Maree (CP000962)</b> |          |                       |    |    |           |
| S001014494                                                | 67A>G    | AluI – (AG'CT)        | 4  | 5  | +1        |
|                                                           | 67A>G    | CviJI – (rG'Cy)       | 26 | 27 | +1        |
|                                                           | 67A>G    | HindIII – (A'AGCTT)   | 0  | 1  | +1, Novel |
| S001014499                                                | 67A>G    | AluI – (AG'CT)        | 4  | 5  | +1        |
|                                                           | 67A>G    | CviJI – (rG'Cy)       | 26 | 27 | +1        |
|                                                           | 67A>G    | HindIII – (A'AGCTT)   | 0  | 1  | +1, Novel |
| S001014484                                                | 1220 C>T | HpyCH4V – (TG'CA)     | 7  | 8  | +1        |
| S001014492                                                | 1220 C>T | HpyCH4V – (TG'CA)     | 7  | 8  | +1        |
| S001014501                                                | 82T>C    | Acil – C'CGC/G'CGG    | 21 | 23 | +2        |
|                                                           | 1317A>G  | Acil – C'CGC/G'CGG    | 21 | 23 | +2        |
|                                                           | 1319A>G  | Hpy188III – (TC'nnGA) | 8  | 7  | -1        |
|                                                           | 1319A>G  | NruI – (TCG'CGA)      | 1  | 0  | -1        |
|                                                           | 1319A>G  | HinfI – (G'AnTC)      | 3  | 2  | -1        |
|                                                           | 1319A>G  | TfiI – (G'AwTC)       | 2  | 1  | -1        |
|                                                           | 1319A>G  | MboI – ('GATC)        | 3  | 4  | +1        |
|                                                           | 1319A>G  | DpnI – (GA'TC)        | 3  | 4  | +1        |
|                                                           | 1319A>G  | BstKTI – (GAT'C)      | 3  | 4  | +1        |
|                                                           | 1319A>G  | AlwI – (GGATCnn)      | 2  | 3  | +1        |
| S002290692                                                | 1326A>G  | Acil – C'CGC/G'CGG    | 21 | 23 | +2        |

|                                                      |                      |                       |    |    |           |
|------------------------------------------------------|----------------------|-----------------------|----|----|-----------|
|                                                      | 1326A>G              | Hpy188III – (TC'nnGA) | 8  | 7  | -1        |
|                                                      | 1326A>G              | NruI – (TCG'CGA)      | 1  | 0  | -1        |
|                                                      | 1326A>G              | HinII – (G'AnTC)      | 3  | 2  | -1        |
|                                                      | 1326A>G              | TfiI – (G'AwTC)       | 2  | 1  | -1        |
|                                                      | 1326A>G              | MboI – ('GATC)        | 3  | 4  | +1        |
|                                                      | 1326A>G              | DpnI – (GA'TC)        | 3  | 4  | +1        |
|                                                      | 1326A>G              | BstKTI – (GAT'C)      | 3  | 4  | +1        |
|                                                      | 1326A>G              | AlwI – (GGATCnn)      | 2  | 3  | +1        |
| S002287648                                           | 74A>G                | AluI – (AG'CT)        | 4  | 5  | +1        |
|                                                      | 74A>G                | CviJI – (rG'Cy)       | 26 | 27 | +1        |
|                                                      | 74A>G                | HindIII – (A'AGCTT)   | 0  | 1  | +1, Novel |
| S002290134                                           | 74A>G                | AluI – (AG'CT)        | 4  | 5  | +1        |
|                                                      | 74A>G                | CviJI – (rG'Cy)       | 26 | 27 | +1        |
|                                                      | 74A>G                | HindIII – (A'AGCTT)   | 0  | 1  | +1, Novel |
| S002290692                                           | 89T>C                | Acil – C'CGC/G'CGG    | 21 | 23 | +2        |
| S002290255                                           | 1227C>T              | HpyCH4V – (TG'CA)     | 7  | 8  | +1        |
| S002289199                                           | 1227C>T              | HpyCH4V – (TG'CA)     | 7  | 8  | +1        |
| <b><i>Clostridium botulinum</i> Kyoto (CP001581)</b> |                      |                       |    |    |           |
| S001350513                                           | 84 G>A               | Tsp509I – ('AATT)     | 3  | 4  | +1        |
| S001350515                                           | 435 A>G,<br>454 T>C  | BfaI – (C'TAG)        | 8  | 6  | -2        |
|                                                      | 454 T>C              | Acc65I – (G'GTACC)    | 0  | 1  | +1, Novel |
|                                                      | 454 T>C              | BanI – (G'GyrCC)      | 0  | 1  | +1, Novel |
|                                                      | 454 T>C              | NlaIV – (GGn'nCC)     | 4  | 5  | +1        |
|                                                      | 454 T>C              | KpnI – (GGTAC'C)      | 0  | 1  | +1, Novel |
| S002290406                                           | 461T>C               | BfaI – (C'TAG)        | 8  | 6  | -2        |
|                                                      | 461T>C               | Acc65I – (G'GTACC)    | 0  | 1  | +1, Novel |
|                                                      | 461T>C               | BanI – (G'GyrCC)      | 0  | 1  | +1, Novel |
|                                                      | 461T>C               | NlaIV – (GGn'nCC)     | 4  | 5  | +1        |
|                                                      | 461T>C               | KpnI – (GGTAC'C)      | 0  | 1  | +1, Novel |
| S002288993                                           | 91G>A                | Tsp509I – ('AATT)     | 3  | 4  | +1        |
| S002290406                                           | 442A>G               | BfaI – (C'TAG)        | 8  | 6  | -2        |
| <b><i>Clostridium botulinum</i> Okra (CP000939)</b>  |                      |                       |    |    |           |
| S001014394                                           | 1420 G>A             | CviJI – (rG'Cy)       | 27 | 26 | -1        |
|                                                      | 1420 G>A             | NlaIV – (GGn'nCC)     | 4  | 4  | 0         |
| S001014396                                           | 1420 G>A             | CviJI – (rG'Cy)       | 27 | 26 | -1        |
|                                                      | 1420 G>A             | NlaIV – (GGn'nCC)     | 4  | 4  | 0         |
| S001014407                                           | 974 G>A,<br>1420 G>A | CviJI – (rG'Cy)       | 27 | 25 | -2        |
|                                                      | 1220C>T              | HpyCH4V – (TG'CA)     | 7  | 8  | +1        |
|                                                      | 1420 G>A             | NlaIV – (GGn'nCC)     | 4  | 4  | 0         |
| S001014404                                           | 1220C>T              | HpyCH4V – (TG'CA)     | 7  | 8  | +1        |
|                                                      | 171T>C,<br>174A>G    | FatI – ('CATG)        | 7  | 8  | +1        |
|                                                      | 171T>C,<br>174A>G    | NlaIII – (CATG')      | 7  | 8  | +1        |
| S002288021                                           | 178T>C,<br>181A>G    | FatI – ('CATG)        | 7  | 8  | +1        |
| S002288021                                           | 1227C>T              | HpyCH4V – (TG'CA)     | 7  | 8  | +1        |
| S002288411                                           | 1227C>T              | HpyCH4V – (TG'CA)     | 7  | 8  | +1        |
| S002288411                                           | 981 G>A              | CviJI – (rG'Cy)       | 27 | 25 | -2        |
| S002288411                                           | 1000 A>G             | Tsp45I – ('GTsAC)     | 3  | 1  | -2        |
|                                                      | 1000 A>G             | AleI – (CACnn'nnGTG)  | 1  | 0  | -1        |
|                                                      | 1000 A>G             | MaeIII – ('GTnAC)     | 6  | 4  | -2        |
|                                                      | 1000 A>G             | MslII – (CAynn'nnrTG) | 1  | 0  | -1        |
| S001014407                                           | 993A>G               | Tsp45I – ('GTsAC)     | 3  | 1  | -2        |
|                                                      | 993A>G               | AleI – (CACnn'nnGTG)  | 1  | 0  | -1        |
|                                                      | 993A>G               | MaeIII – ('GTnAC)     | 6  | 4  | -2        |
|                                                      | 993A>G               | MslII – (CAynn'nnrTG) | 1  | 0  | -1        |
| S002287425                                           | 1427 G>A             | CviJI – (rG'Cy)       | 27 | 26 | -1        |
|                                                      | 1427 G>A             | NlaIV – (GGn'nCC)     | 4  | 4  | 0         |

|                         |          |                       |    |    |           |
|-------------------------|----------|-----------------------|----|----|-----------|
| S002288411              | 1427 G>A | CviJI - (rG'Cy)       | 27 | 26 | -1        |
|                         | 1427 G>A | NlaIV - (GGn'nCC)     | 4  | 4  | 0         |
| <b>H04402 065</b>       |          |                       |    |    |           |
| S002408098              | 454T>C   | Acc65I - (G'GTACC)    | 0  | 1  | +1, Novel |
|                         | 454T>C   | BanI - (G'GyrCC)      | 0  | 1  | +1, Novel |
|                         | 454T>C   | NlaIV - (GGn'nCC)     | 4  | 5  | +1        |
|                         | 454T>C   | KpnI - (GGTAC'C)      | 0  | 1  | +1, Novel |
| S002408093              | 861G>A   | HpyCH4III - AC_n'GT   | 6  | 5  | -1        |
|                         | 861G>A   | MboI - GATC_          | 3  | 3  | 0         |
|                         | 861G>A   | DpnI - GA^TC          | 3  | 4  | +1        |
|                         | 861G>A   | BsiEI - CG_ry'CG      | 2  | 2  | 0         |
|                         | 861G>A   | PvuI - , CG_AT'CG     | 0  | 1  | +1 Novel  |
|                         | 861G>A   | BstKTI - G_AT'C       | 3  | 4  | +1        |
|                         | 861G>A   |                       |    |    |           |
| S002408093              | 67A>G    | AluI - (AG'CT)        | 5  | 4  | -1        |
|                         | 67G>A    | HindIII - (A'AGCTT)   | 1  | 0  | -1        |
|                         | 67G>A    | CviJI - (rG'Cy)       | 27 | 25 | -2        |
| S002408095              | 82T>C    | AciI - C'CGC/G'CGG    | 21 | 23 | +2        |
| S002408089              | 1220C>T  | HpyCH4V - (TG'CA)     | 7  | 8  | +1        |
| S002408093              | 1220C>T  | HpyCH4V - (TG'CA)     | 7  | 8  | +1        |
| S002408095              | 1220C>T  | HpyCH4V - (TG'CA)     | 7  | 8  | +1        |
| <b>230613</b>           |          |                       |    |    |           |
| S002165522 <sup>d</sup> | 454T>C   | Acc65I - (G'GTACC)    | 0  | 1  | +1, Novel |
|                         | 454T>C   | BanI - (G'GyrCC)      | 0  | 1  | +1, Novel |
|                         | 454T>C   | NlaIV - (GGn'nCC)     | 4  | 5  | +1        |
|                         | 454T>C   | KpnI - (GGTAC'C)      | 0  | 1  | +1, Novel |
| S002165524              | 454T>C   | Acc65I - (G'GTACC)    | 0  | 1  | +1, Novel |
|                         | 454T>C   | BanI - (G'GyrCC)      | 0  | 1  | +1, Novel |
|                         | 454T>C   | NlaIV - (GGn'nCC)     | 4  | 5  | +1        |
| S002165515              | 454T>C   | KpnI - (GGTAC'C)      | 0  | 1  | +1, Novel |
|                         | 67G >A   | AluI - (AG'CT)        | 5  | 4  | -1        |
|                         | 67G >A   | HindIII - (A'AGCTT)   | 1  | 0  | -1        |
| S002165522              | 67G >A   | CviJI - (rG'Cy)       | 27 | 25 | -2        |
|                         | 67G >A   | AluI - (AG'CT)        | 5  | 4  | -1        |
|                         | 67G >A   | HindIII - (A'AGCTT)   | 1  | 0  | -1        |
| S002165524              | 67G >A   | CviJI - (rG'Cy)       | 27 | 25 | -2        |
|                         | 67G >A   | AluI - (AG'CT)        | 5  | 4  | -1        |
|                         | 67G >A   | HindIII - (A'AGCTT)   | 1  | 0  | -1        |
| S002165522              | 435A>G   | BfaI - (C'TAG)        | 8  | 6  | -2        |
| S002165524              | 435A>G   | BfaI - (C'TAG)        | 8  | 6  | -2        |
| <b>BKT015925</b>        |          |                       |    |    |           |
| S002441243              | 581C>T   | ApoI - r'AATT_y       | 2  | 2  | 0         |
|                         | 581C>T   | Tsp509I - 'AAT^T      | 6  | 6  | 0         |
|                         | 581C>T   | EcoRI - G'AAT^T_C     | 1  | 0  | -1        |
| S002441251              | 73A>G    | AluI - (AG'CT)        | 5  | 4  | -1        |
|                         | 73A>G    | HindIII - (A'AGCTT)   | 1  | 0  | -1        |
|                         | 73A>G    | CviJI - (rG'Cy)       | 27 | 25 | -2        |
| S002441255              | 73A>G    | AluI - (AG'CT)        | 5  | 4  | -1        |
|                         | 73A>G    | HindIII - (A'AGCTT)   | 1  | 0  | -1        |
|                         | 73A>G    | CviJI - (rG'Cy)       | 27 | 25 | -2        |
| S002441247              | 73A>G    | <b>AluI - (AG'CT)</b> | 5  | 4  | -1        |
|                         | 73A>G    | HindIII - (A'AGCTT)   | 1  | 0  | -1        |
|                         | 73A>G    | CviJI - (rG'Cy)       | 27 | 25 | -2        |
| S002441251              | 246C>T   | AluI - AG'CT          | 5  | 4  | -1        |
| S002441255              | 246C>T   | CviJI - rG'Cy         | 27 | 25 | -2        |
|                         | 246C>T   | BfaI - C'TA_G         | 7  | 7  | 0         |

<sup>a</sup>Y = C or T, R = G or A, W = T or A, K = T or G, S = G or C, M = C or A, D = A or G or T, H = A or C or T

<sup>b</sup>In *C. botulinum* Alaska E43 (CP001078), there were no RE sites at positions 993 and 1000. However, due to nucleotide substitutions at (i) 993G>A, 4 RE sites were generated: 2 at 990 for MaeIII and Tsp45I and 2 novel sites at 993 for AleI and MslI, and (ii) 1000C>T, 3 RE sites were generated: 1 at 998 for MaeIII, 1 at 999 for Tsp45I and 1 at 1000 for HphI. The impact of these changes were evident as follows: (i) number of MaeIII and Tsp45I sites increased by 2 each, (ii) number of HphI site increased by 1, and (iii) novel sites were created for AleI and MslI.

Table S8

Loss of restriction endonuclease sites due to nucleotide changes in *rrs* of *Clostridium botulinum* strains

| <i>Clostridium botulinum</i> strain | RDP Accession No.                                                                                     | Nucleotide Changes <sup>a</sup> | Affected Restriction Endonuclease <sup>b</sup>                                                 |
|-------------------------------------|-------------------------------------------------------------------------------------------------------|---------------------------------|------------------------------------------------------------------------------------------------|
| ATCC 3502                           | S000858478, S000858491                                                                                | 40G>A                           |                                                                                                |
| ATCC 19397                          | S000891576 <sup>d</sup> , S000891584 <sup>d</sup> , S000891587 <sup>d</sup>                           | 67G>A                           |                                                                                                |
| Langeland                           | S000891614, S000891621 <sup>c</sup>                                                                   | 67G >A                          |                                                                                                |
| 230613                              | S002165515, S002165522, S002165524                                                                    | 67G >A                          |                                                                                                |
| H04402 065                          | S002408093, S002408095, S002408098                                                                    | 67G >A                          | Alu I - (AG <sup>+</sup> CT), CviJI - (rG <sup>+</sup> Cy), HindIII - (A <sup>+</sup> AGCTT)   |
| Eklund 17B                          | S001094703, S001094714 <sup>c</sup> , S001094716 <sup>c</sup>                                         | 68G>A                           |                                                                                                |
| ATCC 3502                           | S002289503, S002287460                                                                                | 74G>A                           |                                                                                                |
| Langeland                           | S002288829 <sup>c</sup> , S002290679                                                                  | 74G>A                           |                                                                                                |
| ATCC 19397                          | S002287510 <sup>d</sup> , S002289359 <sup>d</sup> , S002290093 <sup>d</sup>                           | 74G>A                           |                                                                                                |
| Eklund 17B                          | S002290154, S002290368 <sup>c</sup> , S002287177                                                      | 74 G>A                          |                                                                                                |
| ATCC 3502                           | S000858482                                                                                            | 95G>A                           |                                                                                                |
| ATCC 19397                          | S000891580 <sup>d</sup>                                                                               | 122G>A                          | BspMI - (ACCTGCnnnn'nnnn)                                                                      |
|                                     | S002288115 <sup>d</sup>                                                                               | 129 G>A                         |                                                                                                |
| ATCC 3502                           | S002287580                                                                                            | 129 G>A                         |                                                                                                |
| Eklund 17B                          | S001094712                                                                                            | 211G>A                          | AciI - (C <sup>+</sup> CGC)                                                                    |
|                                     | S002290659                                                                                            | 218G>A                          |                                                                                                |
| ATCC 3502                           | S000858486                                                                                            | 223G>A                          | MaeIII - ('GTnAC)                                                                              |
| BKT015925                           | S002441251, S002441255                                                                                | 246C>T                          | AluI - AG <sup>+</sup> CT, CviJI - rG <sup>+</sup> Cy, BfaI - C <sup>+</sup> TA <sub>+</sub> G |
| H04402 065                          | S002408085                                                                                            | 254C>T                          |                                                                                                |
| ATCC 3502                           | S002288844                                                                                            | 257 G>A                         |                                                                                                |
| ATCC 19397                          | S000891582 <sup>d</sup>                                                                               | 250G>A                          |                                                                                                |
| 657                                 | S001416092, S001416097                                                                                | 254C>T                          | MaeIII - ('GTnAC)                                                                              |
| ATCC 19397                          | S002290387                                                                                            | 257 G>A                         |                                                                                                |
| 657                                 | S002287812, S002289183                                                                                | 261C>T                          |                                                                                                |
| ATCC 3502                           | S000858482, S000858488, S000858491                                                                    | 408A>G                          |                                                                                                |
| Langeland                           | S000891621 <sup>c</sup>                                                                               | 435A>G                          |                                                                                                |
| Kyoto                               | S001350515                                                                                            | 435A>G                          |                                                                                                |
| 230613                              | S002165522, S002165524                                                                                | 435A>G                          |                                                                                                |
| ATCC 19397                          | S000891578 <sup>d</sup> , S000891580 <sup>d</sup> , S000891584 <sup>d</sup> , S000891587 <sup>d</sup> | 435A>G                          | BfaI - (C <sup>+</sup> TAG)                                                                    |
| ATCC 3502                           | S002287460, S000858488, S002287580                                                                    | 440 A>G                         |                                                                                                |
| Langeland                           | S002288829 <sup>c</sup>                                                                               | 442A>G                          |                                                                                                |
| Kyoto                               | S002290406                                                                                            | 442A>G                          |                                                                                                |
| ATCC 19397                          | S002287857 <sup>d</sup> , S002288115 <sup>d</sup> , S002290093 <sup>d</sup> , S002289359 <sup>d</sup> | 442A>G                          |                                                                                                |
| Okra                                | S001014407                                                                                            | 974G>A                          | CviJI - (rG <sup>+</sup> Cy)                                                                   |
|                                     | S002288411                                                                                            | 981 G>A                         |                                                                                                |
| Eklund 17B                          | S001094712                                                                                            | 983C>A                          | TaqI - (T <sup>+</sup> CGA)                                                                    |
|                                     | S002290659                                                                                            | 989 C>A                         |                                                                                                |
| Alaska E43                          | S001094755                                                                                            | 983C>A                          | TaqI - (T <sup>+</sup> CGA)                                                                    |
|                                     | S002288105                                                                                            | 989C>A                          |                                                                                                |
| Okra                                | S001014407                                                                                            | 993A>G                          | AleI - (CACnn'nnGTG), MaeIII - ('GTnAC), MslII - (CAyynn'nrTG), Tsp45I - ('GTsAC)              |
| 657                                 | S001416092                                                                                            | 997C>T                          | XmnI - (GAAnn'nnTTC)                                                                           |
| Okra                                | S002288411                                                                                            | 1000 A>G                        | AleI - (CACnn'nnGTG), MaeIII - ('GTnAC)                                                        |
| Eklund 17B                          | S001094707                                                                                            | 1000T>C                         | MslII - (CAyynn'nrTG), Tsp45I - ('GTsAC)                                                       |
| 657                                 | S002289183                                                                                            | 1004C>T                         | XmnI - (GAAnn'nnTTC)                                                                           |
| Eklund 17B                          | S002289462                                                                                            | 1006T>C                         | AleI - (CACnn'nnGTG), MaeIII - ('GTnAC)<br>MslII - (CAyynn'nrTG), Tsp45I - ('GTsAC)            |

|            |                                    |          |                           |
|------------|------------------------------------|----------|---------------------------|
| Langeland  | S000891606, S000891614, S000891616 | 1420G>A  | CviII- rG <sup>c</sup> Cy |
| Okra       | S001014394, S001014407             | 1420G>A  |                           |
| H04402 065 | S002408095                         | 1420G>A  |                           |
| Okra       | S001014394, S001014407             | 1420G>A  |                           |
|            | S002287425, S002288411             | 1427 G>A |                           |
| Langeland  | S002290804, S002290679, S002289298 | 1427G>A  |                           |

<sup>a</sup>Designated by a “>”-character, 40G>A denotes that at nucleotide 40 a G is changed to a A.

<sup>b</sup>y = C or T, r = G or A, s = G or C.

<sup>c</sup>Intragenomic sequences (see Table S2) with changes at similar position.

<sup>d</sup>Intergenomic sequences (see Table S2) with changes at similar position.

Table S9

Affected Restriction enzyme (RE) sites in *rrs* of sequenced genomes of different *Clostridium botulinum*

| <i>C. botulinum</i> strains | <i>rrs</i> |          | Changes in RE sites <sup>a</sup> |          |      |
|-----------------------------|------------|----------|----------------------------------|----------|------|
|                             | Total      | Affected | Novel                            | Addition | Loss |
| ATCC 19397/HALL             | 16         | 12       | 21                               | 44       | 44   |
| Alaska E43                  | 22         | 10       | 20                               | 45       | 2    |
| Langeland                   | 18         | 13       | 12                               | 6        | 36   |
| Kyoto                       | 18         | 4        | 6                                | 4        | 6    |
| 230613                      | 9          | 3        | 6                                | 2        | 16   |
| Loch Maree                  | 18         | 10       | 4                                | 28       | 8    |
| ATCC 3502                   | 18         | 12       | 4                                | 13       | 41   |
| H04402065                   | 9          | 6        | 3                                | 8        | 5    |
| 657                         | 18         | 12       | 0                                | 30       | 8    |
| BKT015925                   | 10         | 4        | 0                                | 0        | 12   |
| Okra                        | 18         | 7        | 0                                | 7        | 20   |
| Eklund 17B                  | 22         | 15       | 0                                | 14       | 65   |

a: Details are presented in Additional Table S7.



Table S10

Location of genes in the 10 completely sequenced genomes of *Clostridium botulinum* used for Cladistic analysis

| Gene                | <i>Clostridium botulinum</i> strains |                            |                    |                   |                  |                        |                         |                   |                         |                         |                         |                        |                 |
|---------------------|--------------------------------------|----------------------------|--------------------|-------------------|------------------|------------------------|-------------------------|-------------------|-------------------------|-------------------------|-------------------------|------------------------|-----------------|
|                     | ATCC 3502/<br>AM412317               | Loch<br>Maree/<br>CP000962 | Kyoto/<br>CP001581 | Okra/<br>CP000939 | 657/<br>CP001083 | Langeland/<br>CP000728 | ATCC 19397/<br>CP000726 | Hall/<br>CP000727 | Eklund 17B/<br>CP001056 | Alaska E43/<br>CP001078 | FR773526/<br>H04402 065 | CP002410/<br>BKT015925 | CP002011/230613 |
| <b><i>AbrB</i></b>  | 95044..95289                         | 88829..89074               | 88931..89177       | 94701..94946      | 88952..89197     | 89739..89984           | 87847..88092            | 87849..88094      | NA                      | NA                      | NA                      | NA                     | NA              |
| <b><i>CphB</i></b>  | 154869..155669                       | 148290..149090             | 148752..149552     | 154658..155458    | 151949..152749   | 149675..150475         | 147671..148471          | 147673..148473    | NA                      | NA                      | NA                      | NA                     | 149938..150738  |
| <b><i>DltB</i></b>  | 68317..68508                         | NA                         | NA                 | NA                | NA               | NA                     | NA                      | NA                | 687020..688174          | 653993..655147          | NA                      | NA                     | NA              |
| <b><i>DltD</i></b>  | 68937..69329                         | 62683..63105               | 63230..63388       | 68848..69105      | 62164..63210     | 63212..64258           | NA                      | NA                | 684195..685379          | 651168..652352          | NA                      | NA                     | NA              |
| <b><i>SfsA</i></b>  | 41636..42328                         | 35845..36537               | 36050..36742       | 41727..42419      | 35626..36318     | 36993..37685           | 41651..42343            | 41651..42343      | NA                      | 2190482..2191174        | NA                      | 2730964..2731656       | 37061..37753    |
| <b><i>SpmB</i></b>  | 101717..102235                       | 95501..96019               | 95606..96124       | 101374..101892    | 95626..96144     | NA                     | 94520..95038            | 94522..95040      | 110541..111068          | 100563..101090          | NA                      | 2640944..2641468       | NA              |
| <b><i>arcA1</i></b> | 97129..98340                         | NA                         | NA                 | NA                | NA               | NA                     | NA                      | NA                | NA                      | NA                      | NA                      | NA                     | NA              |
| <b><i>CcpA</i></b>  | 131661..132659                       | NA                         | NA                 | NA                | NA               | NA                     | NA                      | NA                | NA                      | NA                      | NA                      | NA                     | NA              |
| <b><i>MdeA</i></b>  | 35687..36889                         | NA                         | NA                 | NA                | NA               | NA                     | NA                      | NA                | NA                      | NA                      | NA                      | NA                     | NA              |
| <b><i>psd1</i></b>  | 24804..25562,<br>25565..25690        | NA                         | NA                 | NA                | NA               | NA                     | NA                      | NA                | NA                      | NA                      | NA                      | NA                     | NA              |
| <b><i>psd2</i></b>  | 30610..31497                         | NA                         | NA                 | NA                | NA               | NA                     | NA                      | NA                | NA                      | NA                      | NA                      | NA                     | NA              |
| <b><i>AtpA</i></b>  | 185799..186479                       | 181244..182758             | 182386..183900     | 188341..189855    | 185326..186840   | 182856..184370         | 180668..182182          | 180670..182184    | 495241..496755          | 490312..491826          | NA                      | 2465450..2466958       | 183117..184631  |
| <b><i>AtpC</i></b>  | 186519..186758                       | 185058..185459             | 186200..186601     | 192155..192556    | 189140..189541   | 186670..187071         | 184482..184883          | 184484..184885    | 499068..499472          | 494139..494543          | NA                      | NA                     | 186931..187332  |
| <b><i>BofA</i></b>  | 41225..41485                         | 35434..35694               | 35639..35899       | 41316..41576      | 35215..35475     | 36582..36842           | 41240..41500            | 41240..41500      | 3641493..3641741        | 3485449..3485697        | NA                      | NA                     | 36650..36910    |
| <b><i>CphA</i></b>  | 131661..132659                       | 149134..151755             | 149596..152217     | 155502..158123    | 152793..155414   | 150519..153140         | 148515..151136          | 148517..151138    | 470168..472786          | 465274..467892          | NA                      | NA                     | 150782..153403  |
| <b><i>DnaA</i></b>  | 1..1347                              | 14-1351                    | 157..1494          | 38..1375          | 164..1510        | 1..1338                | 1..1347                 | 1-1347            | 175..1545               | 127..1497               | 1..1338                 | 2771582..2772934       | NA              |
| <b><i>DnaN</i></b>  | 1610..2713                           | 1614-2717                  | 1757..2860         | 1638..2741        | 1773..2876       | 1601..2704             | 1610..2713              | 1610..2713        | 1806..2906              | 1758..2858              | 1601..2704              | 2770223..2771326       | 1601..2704      |
| <b><i>GyrA</i></b>  | 6342..8852                           | 6347-8842                  | 6499..9039         | 6370..8955        | 6506..8986       | 6343..8838             | 6342..8867              | 6342-8867         | 6549..9098              | 6501..9050              | NA                      | 2764060..2766609       | 6343..8802      |
| <b><i>GyrB</i></b>  | 4403..6316                           | 4408-6321                  | 4560..6473         | 4431..6344        | 4567..6480       | 4404..6317             | 4403..6316              | 4403-6316         | 4619..6526              | 4571..6478              | 4394..6307              | 2766631..2768538       | 4404..6317      |
| <b><i>IspE</i></b>  | 158427..159269                       | 151848..152690             | 152310..153152     | 158216..159058    | 155507..156349   | 153233..154075         | 151229..152071          | 151231..152073    | 472967..473809          | 468072..468914          | NA                      | NA                     | 153496..154338  |
| <b><i>IspF</i></b>  | 98426..98893                         | 92210..92677               | 92315..92782       | 98083..98550      | 92333..92800     | 93120..93587           | 91229..91696            | 91231..91698      | 357965..358438          | 351409..351882          | NA                      | 2664831..2665304       | 93385..93852    |

|             |                |                |                |                       |                |                |                |                |                  |                   |                |                  |                |
|-------------|----------------|----------------|----------------|-----------------------|----------------|----------------|----------------|----------------|------------------|-------------------|----------------|------------------|----------------|
| <b>ksgA</b> | 111827..112663 | 105618..106445 | 105725..106552 | 111623..112450        | 109255..110082 | 106660..107487 | 104639..105466 | 104641..105468 | 129582..130433   | 119905..120756    | NA             | 2619392..2620237 | NA             |
| <b>MetG</b> | 105378..107315 | 99161..101098  | 99267..101204  | 105035..106972        | 102797..104734 | 100072..102009 | 98181..100118  | 98183..100120  | 124646..126583   | 114812..116749    | 99037..100974  | 2629554..2631494 | 100337..102274 |
| <b>MnaA</b> | 183767..184924 | 177145..178302 | 178286..179443 | 184242..185399        | 181227..182384 | 178757..179914 | 176569..177726 | 176571..177728 | 489360..490508   | 484596..485744    | NA             | NA               | 179019..180176 |
| <b>NrdD</b> | 122969..125110 | 116731..118872 | 116913..119054 | 122752..124893        | 120449..122590 | 117774..119915 | 115772..117913 | 115774..117915 | 138621..140726   | 128841..130946    | NA             | NA               | NA             |
| <b>NrdG</b> | 125127..125642 | 118889..119404 | 119071..119586 | 124910..125425        | 122607..123122 | 119932..120456 | 117930..118445 | 117932..118447 | 147033..147542   | 137327..137836    | NA             | NA               | 120198..120722 |
| <b>PrfA</b> | 176432..177508 | 169804..170880 | 170319..171395 | 176406..177482        | 173334..174410 | 171424..172500 | 169234..170310 | 169236..170312 | 484556..485638   | 479796..480878    | 170061..171137 | 2478221..2479294 | 171686..172762 |
| <b>PyrG</b> | 169487..171088 | 163040..164641 | 163374..164975 | 169409..171010        | 166570..168171 | 164427..166028 | 162289..163890 | 162291..163892 | 476625..478226   | 471842..473443    | 163114..164715 | 2484517..2486082 | 164690..166291 |
| <b>RecF</b> | 2998..4101     | 3012-4106      | 3164..4258     | 3035..4129            | 3171..4265     | 3008..4102     | 3007..4101     | 3007-4101      | 3223..4308       | 3175..4260        | NA             | 2768847..2769929 | 3008..4102     |
| <b>RecR</b> | 40159..40755   | 34368-34964    | 34573..35169   | 40250..40846          | 34149..34745   | 35516..36112   | 40174..40770   | 40174-40770    | 3642272..3642868 | 3486398..3486994  | NA             | 2739192..2739797 | 35584..36180   |
| <b>Rho</b>  | 172052..173497 | 165424..166869 | 165939..167384 | 172026..173471        | 168954..170399 | 167044..168489 | 164854..166299 | 164856..166301 | 478609..480234   | 473822..475462    | 165681..167126 | 2482325..2483731 | 167306..168751 |
| <b>RpiB</b> | 180520..180957 | 173891-174328  | 174407..174844 | 180493..180930        | 177423..177860 | 175511..175948 | 173322..173759 | 173324-173761  | 487499..487948   | 482739..483188    | NA             | 2474752..2475201 | 175773..176210 |
| <b>RpmE</b> | 173537..173755 | 166909..167127 | 167424..167642 | 173511..173729        | 170439..170657 | 168529..168747 | 166339..166557 | 166341..166559 | 481522..481731   | 476759..476968    | NA             | NA               | 168791..169009 |
| <b>SerS</b> | 22071..23622   | 626050-627327  | 22539..23819   | 629175..630452        | 609017..610294 | 22267..23547   | 576859..578136 | 597295-598572  | 17472..17685     | 17662..18939      | NA             | 2749181..2750461 | NA             |
| <b>SpmA</b> | 101129..101704 | 94913..95488   | 95018..95593   | <b>100786..101361</b> | 95038..95613   | 95823..96398   | 93932..94507   | 93934..94509   | 109950..110525   | 99972..100547     | NA             | 2641491..2642066 | NA             |
| <b>TagO</b> | 182719..183753 | 176097..177131 | 177238..178272 | 183194..184228        | 180179..181213 | 177709..178743 | 175521..176555 | 175523..176557 | 2932031..2932981 | (2736344..2737294 | NA             | NA               | 177971..179005 |
| <b>TdK</b>  | 173982..174557 | 167354..167929 | 167869..168444 | 173956..174531        | 170884..171459 | 168974..169549 | 166784..167359 | 166786..167361 | 481909..482496   | 477146..477733    | NA             | NA               | 169236..169811 |
| <b>Upp</b>  | 180987..181616 | 174358..174987 | 174874..175503 | 180960..181589        | 177890..178519 | 175978..176607 | 173789..174418 | 173791..174420 | 487994..488623   | 483234..483863    | NA             | 2474080..2474709 | 176240..176869 |

[http://www.ncbi.nlm.nih.gov/genomes/MICROBES/microbial\\_taxtree.html](http://www.ncbi.nlm.nih.gov/genomes/MICROBES/microbial_taxtree.html)
